# Supplementary material for: Gastrointestinal Stromal Tumors, Somatic Mutations and Candidate Genetic Risk Variants
Source: PubMed Central journal article supplement (PMC3630216; doi:10.1371/journal.pone.0062119), 2013-04-18
Supplement: pone.0062119.s001.pdf [file pone.0062119.s001.pdf]

**Supplementary Table S1: Minor allele frequencies (MAF) and p-values for comparison of genotype frequencies: Z9001 genotyped whites (n=273) versus non-whites (n=58) and genotyped Z9001 whites versus the HapMap CEU population (n=180)**

| GENE     | VARIANT    | MAF, study whites | MAF, study non-whites | p-value whites vs. non-whites* | MAF, HapMap CEU | p-value whites vs. HapMap CEU* |
|----------|------------|-------------------|-----------------------|--------------------------------|-----------------|--------------------------------|
| ADH1A    | rs12508502 | 0.09              | 0.05                  | 0.37                           | 0.09            | 0.69                           |
| ADH1B    | rs1042026  | 0.28              | 0.30                  | 0.03                           | 0.28            | 0.96                           |
| ADH1B    | rs17033    | 0.09              | 0.05                  | 0.37                           | 0.10            | 0.69                           |
| ADH1C    | rs1693482  | 0.39              | 0.13                  | 2.3E-07                        | 0.48            | 0.10                           |
| AHR      | rs2066853  | 0.12              | 0.38                  | 1.2E-09                        | 0.09            | 0.32                           |
| AHR      | rs713150   | 0.24              | 0.22                  | 0.83                           | 0.22            | 0.76                           |
| ALDH18A1 | rs10509688 | 0.16              | 0.16                  | 0.12                           | 0.21            | 0.09                           |
| ALDH18A1 | rs1053905  | 0.45              | 0.16                  | 4.1E-15                        | 0.48            | 0.55                           |
| ALDH18A1 | rs11188388 | 0.08              | 0.09                  | 0.54                           | 0.06            | 0.81                           |
| ALDH18A1 | rs11188394 | 0.35              | 0.05                  | 3.6E-11                        | 0.38            | 0.41                           |
| ALDH18A1 | rs11188403 | 0.29              | 0.42                  | 3.5E-09                        | 0.32            | 0.64                           |
| ALDH18A1 | rs11188411 | 0.35              | 0.09                  | 3.0E-08                        | 0.35            | 0.98                           |
| ALDH18A1 | rs12773566 | 0.22              | 0.16                  | 0.07                           | 0.26            | 0.39                           |
| ALDH18A1 | rs12778814 | 0.45              | 0.12                  | 1.9E-18                        | 0.48            | 0.63                           |
| ALDH18A1 | rs1409709  | 0.48              | 0.16                  | 2.2E-10                        | 0.46            | 0.74                           |
| ALDH18A1 | rs2275272  | 0.13              | 0.05                  | 0.06                           | 0.11            | 0.67                           |
| ALDH18A1 | rs3750701  | 0.34              | 0.42                  | 0.23                           | 0.31            | 0.44                           |
| ALDH18A1 | rs3793749  | 0.31              | 0.48                  | 9.5E-04                        | 0.31            | 0.91                           |
| ALDH18A1 | rs4037     | 0.35              | 0.09                  | 3.9E-08                        | 0.35            | 1.00                           |
| ALDH18A1 | rs749049   | 0.50              | 0.41                  | 0.23                           | 0.48            | 0.71                           |
| ALDH18A1 | rs8758     | 0.35              | 0.09                  | 3.0E-08                        | NA              |                                |
| ALDH18A1 | rs945958   | 0.15              | 0.41                  | 1.9E-09                        | 0.18            | 0.29                           |
| ALDH1A1  | rs348483   | 0.16              | 0.07                  | 0.02                           | 0.14            | 0.66                           |
| ALDH1A1  | rs348484   | 0.16              | 0.07                  | 0.02                           | 0.14            | 0.66                           |
| ALDH1A1  | rs348485   | 0.22              | 0.22                  | 1.00                           | 0.22            | 0.94                           |
| ALDH1A2  | rs10518961 | 0.41              | 0.40                  | 0.05                           | 0.43            | 0.11                           |
| ALDH1A2  | rs1063666  | 0.48              | 0.39                  | 4.2E-03                        | 0.45            | 0.70                           |
| ALDH1A2  | rs12595180 | 0.48              | 0.40                  | 2.9E-03                        | 0.46            | 0.15                           |
| ALDH1A2  | rs12903202 | 0.10              | 0.00                  | 1.2E-04                        | 0.11            | 0.73                           |
| ALDH1A2  | rs1874158  | 0.08              | 0.19                  | 0.002                          | 0.11            | 0.22                           |
| ALDH1A2  | rs2899613  | 0.44              | 0.41                  | 5.6E-04                        | 0.43            | 0.79                           |
| ALDH1A2  | rs3204689  | 0.44              | 0.20                  | 5.7E-06                        | 0.46            | 0.06                           |
| ALDH1A2  | rs3742959  | 0.48              | 0.37                  | 1.6E-03                        | 0.45            | 0.63                           |
| ALDH1A2  | rs3784259  | 0.49              | 0.38                  | 0.01                           | 0.45            | 0.36                           |
| ALDH1A2  | rs4646576  | 0.34              | 0.16                  | 2.4E-04                        | 0.36            | 0.65                           |
| ALDH1A2  | rs4646615  | 0.34              | 0.26                  | 0.18                           | 0.36            | 0.01                           |
| ALDH1A2  | rs4646626  | 0.49              | 0.40                  | 0.02                           | 0.45            | 0.36                           |
| ALDH1A2  | rs4646642  | 0.48              | 0.39                  | 0.01                           | 0.47            | 0.89                           |
| ALDH1A2  | rs4646644  | 0.08              | 0.19                  | 0.001                          | 0.12            | 0.08                           |
| ALDH1A2  | rs4646645  | 0.47              | 0.38                  | 0.01                           | 0.45            | 0.73                           |
| ALDH1A3  | rs1130738  | 0.45              | 0.46                  | 0.71                           | 0.43            | 0.90                           |
| ALDH1A3  | rs11854028 | 0.46              | 0.44                  | 0.88                           | 0.44            | 0.58                           |
| ALDH1A3  | rs14226    | 0.20              | 0.16                  | 0.36                           | 0.12            | 0.002                          |
| ALDH1A3  | rs4646678  | 0.19              | 0.14                  | 0.24                           | 0.11            | 0.003                          |
| ALDH1A3  | rs7182884  | 0.38              | 0.12                  | 3.8E-07                        | 0.49            | 0.003                          |
| ALDH1B1  | rs10738997 | 0.27              | 0.47                  | 1.9E-04                        | 0.23            | 0.36                           |
| ALDH1B1  | rs2073478  | 0.40              | 0.34                  | 7.6E-06                        | 0.39            | 0.49                           |
| ALDH1B1  | rs3043     | 0.23              | 0.34                  | 0.04                           | 0.23            | 0.88                           |
| ALDH1B1  | rs4242647  | 0.17              | 0.28                  | 0.002                          | 0.16            | 0.82                           |
| ALDH1B1  | rs4878802  | 0.25              | 0.46                  | 6.7E-05                        | 0.22            | 0.51                           |
| ALDH1B1  | rs4878803  | 0.17              | 0.38                  | 6.1E-06                        | 0.13            | 0.52                           |
| ALDH1B1  | rs4878804  | 0.17              | 0.23                  | 0.23                           | NA              |                                |
| ALDH1B1  | rs7040397  | 0.18              | 0.40                  | 2.0E-06                        | 0.17            | 0.94                           |

|         |            |      |      |         |      |       |
|---------|------------|------|------|---------|------|-------|
| ALDH1L1 | rs11715574 | 0.17 | 0.36 | 1.6E-05 | 0.13 | 0.04  |
| ALDH1L1 | rs12636371 | 0.40 | 0.38 | 0.12    | 0.36 | 0.18  |
| ALDH1L1 | rs12638724 | 0.46 | 0.39 | 0.31    | 0.44 | 0.004 |
| ALDH1L1 | rs13060596 | 0.35 | 0.28 | 0.21    | 0.31 | 0.09  |
| ALDH1L1 | rs1868138  | 0.22 | 0.39 | 6.0E-04 | 0.20 | 0.40  |
| ALDH1L1 | rs2003334  | 0.35 | 0.36 | 0.96    | 0.33 | 0.82  |
| ALDH1L1 | rs2044576  | 0.05 | 0.15 | 0.001   | NA   |       |
| ALDH1L1 | rs2290053  | 0.46 | 0.45 | 0.95    | 0.50 | 0.07  |
| ALDH1L1 | rs3772411  | 0.30 | 0.16 | 0.002   | 0.29 | 0.94  |
| ALDH1L1 | rs3772426  | 0.31 | 0.22 | 0.13    | 0.30 | 0.84  |
| ALDH1L1 | rs3816366  | 0.37 | 0.34 | 0.88    | 0.35 | 0.11  |
| ALDH1L1 | rs3843355  | 0.48 | 0.42 | 0.09    | 0.43 | 0.32  |
| ALDH1L1 | rs4646715  | 0.35 | 0.48 | 0.01    | 0.39 | 0.59  |
| ALDH1L1 | rs4646717  | 0.35 | 0.48 | 0.01    | 0.36 | 0.57  |
| ALDH1L1 | rs4646739  | 0.44 | 0.37 | 0.25    | 0.42 | 0.33  |
| ALDH1L1 | rs4646745  | 0.24 | 0.14 | 0.03    | 0.16 | 0.001 |
| ALDH1L1 | rs4646755  | 0.26 | 0.10 | 4.8E-04 | 0.21 | 0.17  |
| ALDH1L1 | rs4646761  | 0.38 | 0.40 | 7.0E-05 | 0.35 | 0.75  |
| ALDH1L1 | rs6774437  | 0.49 | 0.45 | 0.39    | 0.46 | 0.10  |
| ALDH1L1 | rs7639966  | 0.42 | 0.28 | 0.01    | 0.43 | 0.41  |
| ALDH1L1 | rs9847790  | 0.18 | 0.32 | 0.001   | 0.12 | 0.13  |
| ALDH1L2 | rs10459204 | 0.16 | 0.08 | 0.05    | 0.17 | 0.81  |
| ALDH1L2 | rs10746009 | 0.37 | 0.45 | 0.29    | 0.37 | 0.28  |
| ALDH1L2 | rs10778364 | 0.47 | 0.28 | 3.2E-04 | 0.45 | 0.41  |
| ALDH1L2 | rs10861327 | 0.48 | 0.23 | 7.7E-06 | 0.50 | 0.75  |
| ALDH1L2 | rs12372293 | 0.12 | 0.01 | 9.1E-05 | 0.20 | 0.01  |
| ALDH1L2 | rs1345094  | 0.35 | 0.48 | 0.04    | 0.30 | 0.29  |
| ALDH1L2 | rs2374449  | 0.19 | 0.09 | 0.03    | 0.13 | 0.05  |
| ALDH1L2 | rs7299166  | 0.26 | 0.18 | 0.31    | 0.22 | 0.29  |
| ALDH1L2 | rs7954946  | 0.43 | 0.36 | 1.6E-04 | 0.39 | 0.38  |
| ALDH2   | rs10744777 | 0.35 | 0.11 | 4.4E-28 | 0.38 | 0.37  |
| ALDH2   | rs16941669 | 0.10 | 0.06 | 0.34    | 0.14 | 0.26  |
| CYP1A2  | rs2470890  | 0.38 | 0.13 | 7.0E-20 | 0.34 | 0.59  |
| CYP1A2  | rs2472304  | 0.38 | 0.13 | 4.8E-20 | 0.34 | 0.57  |
| CYP1A2  | rs762551   | 0.30 | 0.44 | 0.01    | 0.28 | 0.81  |
| CYP1B1  | rs1056836  | 0.42 | 0.40 | 1.7E-06 | 0.47 | 0.31  |
| CYP1B1  | rs1800440  | 0.21 | 0.05 | 5.6E-05 | 0.18 | 0.47  |
| CYP1B1  | rs2855658  | 0.42 | 0.40 | 9.5E-06 | 0.47 | 0.31  |
| CYP2B6  | rs7250601  | 0.22 | 0.32 | 0.04    | 0.28 | 0.08  |
| CYP2C8  | rs10509681 | 0.10 | 0.03 | 0.08    | 0.13 | 0.19  |
| CYP2C8  | rs1058932  | 0.19 | 0.36 | 3.2E-04 | 0.19 | 0.23  |
| CYP2C8  | rs11188156 | 0.33 | 0.44 | 0.03    | 0.32 | 0.70  |
| CYP2C8  | rs11572126 | 0.13 | 0.13 | 1.00    | 0.10 | 0.44  |
| CYP2C8  | rs11572174 | 0.10 | 0.03 | 0.08    | 0.13 | 0.19  |
| CYP2C8  | rs1891071  | 0.35 | 0.33 | 0.91    | 0.38 | 0.52  |
| CYP2C8  | rs1934952  | 0.35 | 0.28 | 0.20    | 0.35 | 0.99  |
| CYP2C8  | rs1934956  | 0.14 | 0.26 | 0.002   | 0.12 | 0.79  |
| CYP2C8  | rs2185571  | 0.32 | 0.13 | 9.8E-05 | 0.30 | 0.73  |
| CYP2C8  | rs2275622  | 0.32 | 0.26 | 0.46    | 0.33 | 0.82  |
| CYP2C9  | rs1057910  | 0.08 | 0.01 | 0.01    | 0.05 | 0.32  |
| CYP2C9  | rs1934963  | 0.18 | 0.15 | 0.32    | 0.20 | 0.87  |
| CYP2C9  | rs1934967  | 0.22 | 0.12 | 0.05    | 0.23 | 0.79  |
| CYP2C9  | rs1934968  | 0.09 | 0.13 | 0.18    | 0.10 | 0.60  |
| CYP2C9  | rs2298037  | 0.17 | 0.09 | 0.12    | 0.15 | 0.06  |
| CYP2C9  | rs4917636  | 0.11 | 0.03 | 0.02    | 0.16 | 0.10  |
| CYP2C9  | rs4918758  | 0.36 | 0.31 | 0.50    | 0.37 | 0.45  |
| CYP2C9  | rs9332100  | 0.11 | 0.03 | 0.02    | 0.15 | 0.30  |
| CYP2C9  | rs9332174  | 0.23 | 0.17 | 0.38    | 0.22 | 0.53  |

|        |            |      |      |         |      |      |
|--------|------------|------|------|---------|------|------|
| CYP2C9 | rs9332216  | 0.11 | 0.03 | 0.02    | 0.15 | 0.34 |
| CYP2C9 | rs9332242  | 0.11 | 0.03 | 0.02    | 0.16 | 0.14 |
| CYP2D6 | rs1135840  | 0.43 | 0.36 | 0.30    | NA   |      |
| CYP2E1 | rs2070673  | 0.16 | 0.39 | 6.3E-24 | 0.16 | 0.86 |
| CYP2E1 | rs2515641  | 0.10 | 0.44 | 1.0E-14 | 0.13 | 0.08 |
| CYP3A4 | rs12333983 | 0.11 | 0.41 | 3.6E-23 | 0.12 | 0.47 |
| ERCC2  | rs13181    | 0.34 | 0.20 | 0.01    | 0.31 | 0.10 |
| ERCC2  | rs171140   | 0.49 | 0.18 | 5.8E-09 | 0.48 | 0.42 |
| ERCC2  | rs1799787  | 0.26 | 0.10 | 8.2E-04 | 0.25 | 0.29 |
| ERCC2  | rs3916874  | 0.26 | 0.12 | 0.01    | 0.34 | 0.02 |
| ERCC2  | rs50871    | 0.49 | 0.16 | 1.7E-10 | 0.46 | 0.13 |
| ERCC2  | rs50872    | 0.22 | 0.19 | 0.77    | 0.30 | 0.02 |
| ERCC5  | rs1047768  | 0.40 | 0.39 | 0.91    | 0.42 | 0.65 |
| ERCC5  | rs17655    | 0.21 | 0.45 | 4.4E-07 | 0.27 | 0.19 |
| ERCC5  | rs2016073  | 0.21 | 0.29 | 0.03    | 0.20 | 0.52 |
| ERCC5  | rs2094258  | 0.16 | 0.22 | 0.18    | 0.18 | 0.22 |
| ERCC5  | rs3759500  | 0.24 | 0.18 | 0.14    | 0.22 | 0.70 |
| ERCC5  | rs4150351  | 0.19 | 0.03 | 3.7E-05 | 0.18 | 0.81 |
| ERCC5  | rs4150383  | 0.18 | 0.06 | 0.002   | 0.18 | 0.79 |
| ERCC5  | rs4150386  | 0.12 | 0.03 | 0.02    | 0.13 | 0.81 |
| ERCC5  | rs4743     | 0.45 | 0.23 | 1.5E-05 | 0.36 | 0.07 |
| G6PC   | rs161630   | 0.09 | 0.17 | 0.01    | 0.11 | 0.47 |
| G6PC   | rs2229611  | 0.23 | 0.38 | 2.0E-03 | 0.24 | 0.87 |
| G6PC   | rs324079   | 0.00 | 0.19 | 0.13    | 0.13 | 0.53 |
| GSTM1  | GSTM1      | 0.46 | 0.36 | 0.01    |      |      |
| GSTM1  | rs3815029  | 0.40 | 0.34 | 0.07    | NA   |      |
| GSTP1  | rs1138272  | 0.09 | 0.02 | 0.01    | 0.09 | 0.58 |
| GSTP1  | rs1695     | 0.35 | 0.30 | 0.63    | 0.40 | 0.15 |
| GSTP1  | rs6591256  | 0.42 | 0.29 | 0.02    | 0.46 | 0.56 |
| GSTT1  | GSTT1      | 0.20 | 0.27 | 0.25    |      |      |
| HIF1A  | rs10873142 | 0.16 | 0.43 | 1.5E-18 | 0.14 | 0.57 |
| HIF1A  | rs11549465 | 0.09 | 0.04 | 0.39    | 0.07 | 0.76 |
| HIF1A  | rs12434438 | 0.19 | 0.32 | 1.5E-23 | 0.17 | 0.46 |
| HIF1A  | rs2057482  | 0.13 | 0.33 | 6.0E-06 | 0.10 | 0.38 |
| HIF1A  | rs2301113  | 0.21 | 0.27 | 1.4E-25 | 0.18 | 0.48 |
| HNF4A  | rs11086926 | 0.08 | 0.21 | 2.9E-04 | 0.05 | 0.17 |
| HNF4A  | rs11574736 | 0.18 | 0.08 | 0.02    | 0.17 | 0.90 |
| HNF4A  | rs2071200  | 0.26 | 0.49 | 5.4E-09 | 0.22 | 0.39 |
| HNF4A  | rs2425640  | 0.37 | 0.38 | 0.81    | 0.30 | 0.11 |
| HNF4A  | rs3212199  | 0.40 | 0.41 | 4.8E-04 | 0.43 | 0.64 |
| HNF4A  | rs3818247  | 0.37 | 0.47 | 1.6E-03 | 0.34 | 0.30 |
| HNF4A  | rs6031595  | 0.48 | 0.20 | 9.0E-10 | 0.44 | 0.52 |
| HNF4A  | rs6073432  | 0.31 | 0.32 | 0.83    | 0.30 | 0.77 |
| HNF4A  | rs6093978  | 0.35 | 0.29 | 0.47    | 0.35 | 0.93 |
| HNF4A  | rs6130615  | 0.12 | 0.49 | 3.2E-19 | 0.13 | 0.69 |
| HNF4A  | rs8114057  | 0.48 | 0.50 | 0.16    | 0.47 | 0.78 |
| MDM2   | rs1625525  | 0.41 | 0.20 | 4.6E-05 | 0.49 | 0.05 |
| MDM2   | rs1846402  | 0.19 | 0.09 | 0.01    | 0.18 | 0.87 |
| MDM2   | rs3730581  | 0.37 | 0.25 | 0.06    | 0.28 | 0.02 |
| NAT2   | rs11780272 | 0.43 | 0.28 | 0.01    | 0.41 | 0.88 |
| NAT2   | rs1208     | 0.42 | 0.39 | 0.63    | 0.41 | 0.93 |
| NAT2   | rs17516895 | 0.34 | 0.21 | 0.02    | NA   |      |
| NAT2   | rs1801280  | 0.45 | 0.33 | 0.07    | 0.47 | 0.73 |
| NAT2   | rs1961456  | 0.30 | 0.37 | 0.08    | 0.31 | 0.39 |
| NAT2   | rs4646242  | 0.29 | 0.22 | 0.43    | 0.31 | 0.43 |
| NAT2   | rs4646243  | 0.16 | 0.18 | 0.30    | 0.19 | 0.04 |
| NAT2   | rs4646246  | 0.19 | 0.28 | 0.03    | 0.22 | 0.09 |
| NAT2   | rs6984200  | 0.29 | 0.27 | 0.77    | 0.31 | 0.67 |

|         |            |      |      |         |      |      |
|---------|------------|------|------|---------|------|------|
| NAT2    | rs7832071  | 0.42 | 0.40 | 0.36    | 0.40 | 0.88 |
| NFE2L2  | rs13401026 | 0.10 | 0.22 | 2.8E-04 | 0.11 | 0.95 |
| NFE2L2  | rs2588882  | 0.08 | 0.10 | 0.23    | 0.08 | 0.68 |
| NFE2L2  | rs8470     | 0.19 | 0.46 | 1.2E-12 | 0.21 | 0.61 |
| NFE2L2  | rs9068     | 0.19 | 0.50 | 1.3E-14 | 0.21 | 0.61 |
| NOS2A   | rs10459953 | 0.36 | 0.33 | 0.15    | 0.44 | 0.16 |
| NOS2A   | rs1113283  | 0.22 | 0.22 | 0.94    | 0.22 | 0.19 |
| NOS2A   | rs2297516  | 0.40 | 0.41 | 0.89    | 0.39 | 0.62 |
| NOS2A   | rs2297518  | 0.18 | 0.13 | 0.35    | 0.17 | 0.73 |
| NOS2A   | rs2779252  | 0.05 | 0.10 | 0.05    | 0.05 | 0.82 |
| NOS2A   | rs3794763  | 0.22 | 0.29 | 0.01    | 0.19 | 0.50 |
| NOS2A   | rs4795067  | 0.33 | 0.29 | 0.73    | 0.33 | 0.42 |
| NOS2A   | rs4796052  | 0.19 | 0.16 | 0.80    | 0.16 | 0.33 |
| NOS2A   | rs8072199  | 0.42 | 0.19 | 1.0E-05 | 0.48 | 0.03 |
| NOS2A   | rs944725   | 0.38 | 0.47 | 0.21    | 0.38 | 0.55 |
| NQO1    | rs10517    | 0.16 | 0.21 | 0.21    | 0.10 | 0.04 |
| NQO1    | rs17298718 | 0.08 | 0.04 | 0.58    | 0.07 | 1.00 |
| NQO1    | rs1800566  | 0.19 | 0.32 | 3.2E-04 | 0.18 | 0.79 |
| NQO1    | rs34763938 | 0.06 | 0.07 | 0.24    | NA   |      |
| PTGS2   | rs10911902 | 0.17 | 0.07 | 0.03    | 0.22 | 0.06 |
| PTGS2   | rs5277     | 0.13 | 0.06 | 0.03    | 0.19 | 0.12 |
| RAD23B  | rs10868    | 0.12 | 0.02 | 2.4E-04 | 0.11 | 0.61 |
| RAD23B  | rs1805329  | 0.21 | 0.05 | 7.6E-05 | 0.14 | 0.16 |
| RAD23B  | rs1805330  | 0.07 | 0.16 | 0.01    | 0.09 | 0.27 |
| RAD23B  | rs1805334  | 0.26 | 0.09 | 4.6E-04 | 0.23 | 0.57 |
| RAD23B  | rs7041137  | 0.29 | 0.32 | 0.36    | 0.26 | 0.58 |
| SULT1A1 | rs1968752  | 0.40 | 0.34 | 0.58    | 0.36 | 0.56 |
| TP53    | rs1614984  | 0.43 | 0.34 | 0.02    | NA   |      |
| XPA     | rs1800975  | 0.34 | 0.32 | 0.34    | 0.37 | 0.45 |
| XPA     | rs3176757  | 0.21 | 0.23 | 0.30    | 0.25 | 0.42 |
| XPC     | rs1043943  | 0.41 | 0.34 | 0.38    | 0.39 | 0.85 |
| XPC     | rs10468    | 0.21 | 0.05 | 5.6E-05 | 0.29 | 0.04 |
| XPC     | rs1106087  | 0.22 | 0.10 | 0.02    | 0.28 | 0.06 |
| XPC     | rs2228000  | 0.22 | 0.10 | 0.02    | 0.28 | 0.07 |
| XPC     | rs2228001  | 0.40 | 0.34 | 0.39    | 0.40 | 0.99 |
| XPC     | rs2470458  | 0.19 | 0.10 | 0.002   | 0.25 | 0.09 |
| XPC     | rs2607737  | 0.49 | 0.46 | 0.78    | 0.48 | 0.95 |
| XPC     | rs2607772  | 0.40 | 0.32 | 0.20    | 0.40 | 0.96 |
| XPC     | rs2733534  | 0.47 | 0.24 | 1.5E-05 | 0.48 | 0.98 |
| XPC     | rs2733537  | 0.29 | 0.19 | 0.07    | 0.37 | 0.04 |
| XPC     | rs2733587  | 0.10 | 0.09 | 0.88    | 0.16 | 0.04 |
| XPC     | rs3731149  | 0.26 | 0.19 | 0.26    | 0.20 | 0.06 |
