# Supplementary material for: Gastrointestinal Stromal Tumors, Somatic Mutations and Candidate Genetic Risk Variants
Source: PubMed Central journal article supplement (PMC3630216; doi:10.1371/journal.pone.0062119), 2013-04-18
Supplement: pone.0062119.s002.pdf [file pone.0062119.s002.pdf]

|          |            |                        |                   |                   |                   |                   |                   |                    |                   |
|----------|------------|------------------------|-------------------|-------------------|-------------------|-------------------|-------------------|--------------------|-------------------|
|          |            | <b>p-value</b>         | 0.7               | 0.8               | 0.1               | 1.0               | 0.4               | 1.0                | 0.8               |
| ALDH18A1 | rs1409709  | <b>MAF<sup>a</sup></b> | 0.45/0.42         | 0.44/0.42         | 0.33/0.44         | 0.43/0.42         | 0.50/0.42         | 0.36/0.43          | 0.49/0.41         |
|          |            | <b>OR (95% CI)</b>     | 1.27 (0.83, 1.94) | 1.13 (0.61, 2.09) | 0.67 (0.40, 1.12) | 1.05 (0.67, 1.65) | 1.19 (0.59, 2.40) | 1.43 (0.78, 2.61)  | 1.16 (0.69, 1.96) |
|          |            | <b>p-value</b>         | 0.3               | 0.7               | 0.1               | 0.8               | 0.6               | 0.3                | 0.6               |
| ALDH18A1 | rs2275272  | <b>MAF<sup>a</sup></b> | 0.11/0.11         | 0.09/0.11         | 0.11/0.11         | 0.14/0.10         | 0.17/0.11         | 0.03/0.12          | 0.11/0.11         |
|          |            | <b>OR (95% CI)</b>     | 1.00 (0.53, 1.91) | 0.77 (0.29, 2.04) | 1.07 (0.51, 2.24) | 1.60 (0.85, 3.03) | 1.57 (0.61, 4.02) | 4.39 (1.02, 18.90) | 0.90 (0.40, 2.05) |
|          |            | <b>p-value</b>         | 1.0               | 0.6               | 0.9               | 0.1               | 0.4               | 0.0                | 0.8               |
| ALDH18A1 | rs3750701  | <b>MAF<sup>a</sup></b> | 0.36/0.35         | 0.29/0.36         | 0.34/0.35         | 0.35/0.35         | 0.39/0.35         | 0.45/0.34          | 0.31/0.36         |
|          |            | <b>OR (95% CI)</b>     | 1.04 (0.70, 1.54) | 0.73 (0.40, 1.33) | 0.92 (0.58, 1.46) | 1.01 (0.66, 1.56) | 1.24 (0.62, 2.46) | 0.69 (0.41, 1.18)  | 0.82 (0.48, 1.41) |
|          |            | <b>p-value</b>         | 0.9               | 0.3               | 0.7               | 1.0               | 0.5               | 0.2                | 0.5               |
| ALDH18A1 | rs3793749  | <b>MAF<sup>a</sup></b> | 0.30/0.35         | 0.36/0.34         | 0.44/0.32         | 0.38/0.33         | 0.28/0.34         | 0.22/0.35          | 0.33/0.34         |
|          |            | <b>OR (95% CI)</b>     | 0.76 (0.50, 1.16) | 1.07 (0.59, 1.94) | 1.61 (1.01, 2.57) | 1.19 (0.76, 1.85) | 0.80 (0.37, 1.71) | 1.83 (0.96, 3.50)  | 1.03 (0.60, 1.77) |
|          |            | <b>p-value</b>         | 0.2               | 0.8               | 0.0               | 0.4               | 0.6               | 0.1                | 0.9               |
| ALDH18A1 | rs4037     | <b>MAF<sup>a</sup></b> | 0.33/0.30         | 0.36/0.30         | 0.21/0.32         | 0.28/0.31         | 0.33/0.30         | 0.33/0.30          | 0.36/0.30         |
|          |            | <b>OR (95% CI)</b>     | 1.29 (0.84, 2.00) | 1.32 (0.72, 2.42) | 0.60 (0.34, 1.05) | 0.81 (0.50, 1.31) | 0.98 (0.47, 2.04) | 0.87 (0.48, 1.59)  | 1.20 (0.69, 2.07) |
|          |            | <b>p-value</b>         | 0.2               | 0.4               | 0.1               | 0.4               | 0.9               | 0.7                | 0.5               |
| ALDH18A1 | rs749049   | <b>MAF<sup>a</sup></b> | 0.50/0.49         | 0.55/0.48         | 0.49/0.49         | 0.46/0.50         | 0.50/0.49         | 0.45/0.50          | 0.51/0.49         |
|          |            | <b>OR (95% CI)</b>     | 1.07 (0.72, 1.58) | 1.29 (0.74, 2.25) | 1.02 (0.65, 1.60) | 0.84 (0.55, 1.28) | 1.01 (0.51, 1.98) | 1.17 (0.68, 2.01)  | 1.12 (0.68, 1.87) |
|          |            | <b>p-value</b>         | 0.7               | 0.4               | 0.9               | 0.4               | 1.0               | 0.6                | 0.7               |
| ALDH18A1 | rs8758     | <b>MAF<sup>a</sup></b> | 0.33/0.30         | 0.36/0.30         | 0.21/0.32         | 0.28/0.31         | 0.33/0.30         | 0.33/0.30          | 0.36/0.30         |
|          |            | <b>OR (95% CI)</b>     | 1.29 (0.84, 2.00) | 1.32 (0.72, 2.42) | 0.60 (0.34, 1.05) | 0.81 (0.50, 1.31) | 0.98 (0.47, 2.04) | 0.87 (0.48, 1.59)  | 1.20 (0.69, 2.07) |
|          |            | <b>p-value</b>         | 0.2               | 0.4               | 0.1               | 0.4               | 0.9               | 0.7                | 0.5               |
| ALDH18A1 | rs945958   | <b>MAF<sup>a</sup></b> | 0.24/0.19         | 0.14/0.21         | 0.20/0.20         | 0.18/0.20         | 0.17/0.20         | 0.29/0.19          | 0.14/0.21         |
|          |            | <b>OR (95% CI)</b>     | 1.26 (0.79, 2.00) | 0.65 (0.30, 1.43) | 0.88 (0.50, 1.55) | 0.84 (0.49, 1.44) | 1.01 (0.42, 2.46) | 0.53 (0.28, 0.99)  | 0.80 (0.40, 1.60) |
|          |            | <b>p-value</b>         | 0.3               | 0.3               | 0.7               | 0.5               | 1.0               | 0.0                | 0.5               |
| ALDH1A1  | rs348483   | <b>MAF<sup>a</sup></b> | 0.13/0.15         | 0.13/0.15         | 0.14/0.14         | 0.15/0.14         | 0.22/0.14         | 0.14/0.14          | 0.14/0.14         |
|          |            | <b>OR (95% CI)</b>     | 0.89 (0.51, 1.57) | 0.79 (0.35, 1.81) | 1.06 (0.56, 1.98) | 1.05 (0.59, 1.87) | 1.63 (0.73, 3.65) | 1.07 (0.49, 2.34)  | 0.92 (0.45, 1.89) |
|          |            | <b>p-value</b>         | 0.7               | 0.6               | 0.9               | 0.9               | 0.2               | 0.9                | 0.8               |
| ALDH1A1  | rs348484   | <b>MAF<sup>a</sup></b> | 0.13/0.15         | 0.13/0.15         | 0.14/0.14         | 0.15/0.14         | 0.22/0.14         | 0.14/0.14          | 0.14/0.14         |
|          |            | <b>OR (95% CI)</b>     | 0.89 (0.51, 1.57) | 0.79 (0.35, 1.81) | 1.06 (0.56, 1.98) | 1.05 (0.59, 1.87) | 1.63 (0.73, 3.65) | 1.07 (0.49, 2.34)  | 0.92 (0.45, 1.89) |
|          |            | <b>p-value</b>         | 0.7               | 0.6               | 0.9               | 0.9               | 0.2               | 0.9                | 0.8               |
| ALDH1A1  | rs348485   | <b>MAF<sup>a</sup></b> | 0.25/0.21         | 0.20/0.22         | 0.23/0.22         | 0.22/0.22         | 0.22/0.22         | 0.21/0.22          | 0.19/0.23         |
|          |            | <b>OR (95% CI)</b>     | 1.21 (0.77, 1.92) | 0.82 (0.41, 1.64) | 1.06 (0.62, 1.82) | 0.97 (0.59, 1.61) | 1.03 (0.46, 2.34) | 1.07 (0.54, 2.10)  | 0.84 (0.44, 1.60) |
|          |            | <b>p-value</b>         | 0.4               | 0.6               | 0.8               | 0.9               | 0.9               | 0.9                | 0.6               |
| ALDH1A2  | rs10518961 | <b>MAF<sup>a</sup></b> | 0.45/0.40         | 0.43/0.41         | 0.33/0.43         | 0.39/0.41         | 0.44/0.41         | 0.34/0.42          | 0.49/0.40         |
|          |            | <b>OR (95% CI)</b>     | 1.20 (0.82, 1.75) | 1.08 (0.63, 1.85) | 0.70 (0.44, 1.11) | 0.90 (0.60, 1.35) | 1.16 (0.59, 2.28) | 1.29 (0.73, 2.30)  | 1.41 (0.85, 2.36) |
|          |            | <b>p-value</b>         | 0.4               | 0.8               | 0.1               | 0.6               | 0.7               | 0.4                | 0.2               |
| ALDH1A2  | rs1063666  | <b>MAF<sup>a</sup></b> | 0.46/0.48         | 0.54/0.49         | 0.47/0.50         | 0.48/0.50         | 0.47/0.50         | 0.41/0.49          | 0.53/0.49         |
|          |            | <b>OR (95% CI)</b>     | 1.27 (0.85, 1.88) | 1.19 (0.69, 2.08) | 0.92 (0.59, 1.45) | 0.90 (0.60, 1.37) | 0.83 (0.41, 1.67) | 1.39 (0.78, 2.46)  | 1.06 (0.63, 1.79) |
|          |            | <b>p-value</b>         | 0.2               | 0.5               | 0.7               | 0.6               | 0.6               | 0.3                | 0.8               |
| ALDH1A2  | rs12595180 | <b>MAF<sup>a</sup></b> | 0.47/0.49         | 0.57/0.49         | 0.47/0.50         | 0.45/0.51         | 0.50/0.50         | 0.43/0.50          | 0.54/0.49         |
|          |            | <b>OR (95% CI)</b>     | 1.21 (0.83, 1.78) | 1.37 (0.79, 2.38) | 0.92 (0.59, 1.43) | 0.75 (0.50, 1.14) | 0.96 (0.48, 1.90) | 1.26 (0.72, 2.20)  | 1.15 (0.69, 1.93) |
|          |            | <b>p-value</b>         | 0.3               | 0.3               | 0.7               | 0.2               | 0.9               | 0.4                | 0.6               |
| ALDH1A2  | rs12903202 | <b>MAF<sup>a</sup></b> | 0.08/0.08         | 0.09/0.07         | 0.12/0.07         | 0.05/0.08         | 0.03/0.08         | 0.07/0.08          | 0.07/0.08         |
|          |            | <b>OR (95% CI)</b>     | 1.10 (0.51, 2.38) | 1.27 (0.45, 3.56) | 2.44 (1.11, 5.37) | 0.64 (0.25, 1.59) | 0.27 (0.03, 2.04) | 1.13 (0.37, 3.47)  | 0.70 (0.25, 1.96) |

|         |            |                        |                   |                   |                   |                   |                   |                    |                   |
|---------|------------|------------------------|-------------------|-------------------|-------------------|-------------------|-------------------|--------------------|-------------------|
|         |            | <b>p-value</b>         | 0.8               | 0.6               | 0.0               | 0.3               | 0.2               | 0.8                | 0.5               |
| ALDH1A2 | rs1874158  | <b>MAF<sup>a</sup></b> | 0.11/0.11         | 0.16/0.10         | 0.12/0.10         | 0.11/0.11         | 0.08/0.11         | 0.05/0.11          | 0.10/0.11         |
|         |            | <b>OR (95% CI)</b>     | 0.93 (0.48, 1.80) | 1.80 (0.78, 4.14) | 1.13 (0.54, 2.35) | 0.95 (0.47, 1.94) | 0.90 (0.25, 3.24) | 2.26 (0.66, 7.71)  | 1.11 (0.45, 2.74) |
|         |            | <b>p-value</b>         | 0.8               | 0.2               | 0.7               | 0.9               | 0.9               | 0.2                | 0.8               |
| ALDH1A2 | rs2899613  | <b>MAF<sup>a</sup></b> | 0.43/0.48         | 0.43/0.47         | 0.49/0.46         | 0.53/0.45         | 0.47/0.47         | 0.48/0.46          | 0.42/0.47         |
|         |            | <b>OR (95% CI)</b>     | 0.81 (0.55, 1.20) | 0.86 (0.50, 1.49) | 1.05 (0.68, 1.64) | 1.39 (0.92, 2.09) | 1.11 (0.56, 2.20) | 0.97 (0.56, 1.68)  | 0.85 (0.50, 1.42) |
|         |            | <b>p-value</b>         | 0.3               | 0.6               | 0.8               | 0.1               | 0.8               | 0.9                | 0.5               |
| ALDH1A2 | rs3204689  | <b>MAF<sup>a</sup></b> | 0.42/0.38         | 0.39/0.39         | 0.37/0.40         | 0.35/0.40         | 0.42/0.39         | 0.38/0.39          | 0.44/0.38         |
|         |            | <b>OR (95% CI)</b>     | 1.22 (0.81, 1.83) | 1.01 (0.57, 1.78) | 0.97 (0.60, 1.55) | 0.78 (0.50, 1.20) | 0.96 (0.48, 1.93) | 1.03 (0.58, 1.84)  | 1.10 (0.65, 1.85) |
|         |            | <b>p-value</b>         | 0.3               | 1.0               | 0.9               | 0.3               | 0.9               | 0.9                | 0.7               |
| ALDH1A2 | rs3742959  | <b>MAF<sup>a</sup></b> | 0.45/0.48         | 0.54/0.49         | 0.44/0.50         | 0.46/0.50         | 0.47/0.49         | 0.43/0.50          | 0.53/0.49         |
|         |            | <b>OR (95% CI)</b>     | 1.35 (0.91, 1.99) | 1.20 (0.70, 2.07) | 0.85 (0.54, 1.33) | 0.84 (0.56, 1.27) | 0.84 (0.42, 1.67) | 1.25 (0.72, 2.19)  | 1.06 (0.64, 1.78) |
|         |            | <b>p-value</b>         | 0.1               | 0.5               | 0.5               | 0.4               | 0.6               | 0.4                | 0.8               |
| ALDH1A2 | rs3784259  | <b>MAF<sup>a</sup></b> | 0.48/0.47         | 0.54/0.48         | 0.44/0.49         | 0.45/0.49         | 0.50/0.48         | 0.40/0.49          | 0.53/0.48         |
|         |            | <b>OR (95% CI)</b>     | 1.25 (0.85, 1.84) | 1.26 (0.73, 2.16) | 0.89 (0.57, 1.38) | 0.82 (0.55, 1.24) | 1.01 (0.51, 1.98) | 1.40 (0.80, 2.46)  | 1.12 (0.68, 1.86) |
|         |            | <b>p-value</b>         | 0.2               | 0.4               | 0.6               | 0.3               | 1.0               | 0.2                | 0.7               |
| ALDH1A2 | rs4646576  | <b>MAF<sup>a</sup></b> | 0.31/0.30         | 0.29/0.30         | 0.22/0.32         | 0.28/0.31         | 0.39/0.30         | 0.31/0.30          | 0.39/0.29         |
|         |            | <b>OR (95% CI)</b>     | 1.11 (0.72, 1.71) | 0.91 (0.49, 1.69) | 0.65 (0.37, 1.12) | 0.84 (0.53, 1.35) | 1.36 (0.66, 2.80) | 0.94 (0.51, 1.74)  | 1.43 (0.83, 2.47) |
|         |            | <b>p-value</b>         | 0.6               | 0.8               | 0.1               | 0.5               | 0.4               | 0.8                | 0.2               |
| ALDH1A2 | rs4646615  | <b>MAF<sup>a</sup></b> | 0.34/0.31         | 0.32/0.32         | 0.34/0.31         | 0.30/0.32         | 0.28/0.32         | 0.26/0.32          | 0.33/0.31         |
|         |            | <b>OR (95% CI)</b>     | 1.17 (0.77, 1.78) | 1.04 (0.57, 1.88) | 1.20 (0.74, 1.94) | 0.93 (0.59, 1.46) | 0.77 (0.36, 1.66) | 1.38 (0.73, 2.60)  | 1.00 (0.57, 1.73) |
|         |            | <b>p-value</b>         | 0.5               | 0.9               | 0.5               | 0.7               | 0.5               | 0.3                | 1.0               |
| ALDH1A2 | rs4646626  | <b>MAF<sup>a</sup></b> | 0.48/0.47         | 0.54/0.48         | 0.46/0.49         | 0.45/0.49         | 0.50/0.48         | 0.40/0.49          | 0.53/0.48         |
|         |            | <b>OR (95% CI)</b>     | 1.23 (0.84, 1.81) | 1.25 (0.73, 2.15) | 0.92 (0.59, 1.43) | 0.82 (0.55, 1.23) | 1.01 (0.51, 1.97) | 1.41 (0.80, 2.47)  | 1.11 (0.67, 1.84) |
|         |            | <b>p-value</b>         | 0.3               | 0.4               | 0.7               | 0.3               | 1.0               | 0.2                | 0.7               |
| ALDH1A2 | rs4646642  | <b>MAF<sup>a</sup></b> | 0.46/0.49         | 0.54/0.49         | 0.47/0.50         | 0.49/0.50         | 0.47/0.50         | 0.41/0.49          | 0.53/0.49         |
|         |            | <b>OR (95% CI)</b>     | 0.79 (0.53, 1.17) | 0.84 (0.48, 1.47) | 1.10 (0.70, 1.73) | 1.07 (0.71, 1.62) | 1.22 (0.61, 2.44) | 0.72 (0.40, 1.27)  | 0.96 (0.57, 1.63) |
|         |            | <b>p-value</b>         | 0.2               | 0.5               | 0.7               | 0.8               | 0.6               | 0.3                | 0.9               |
| ALDH1A2 | rs4646644  | <b>MAF<sup>a</sup></b> | 0.12/0.10         | 0.14/0.10         | 0.10/0.10         | 0.13/0.10         | 0.06/0.11         | 0.03/0.11          | 0.08/0.11         |
|         |            | <b>OR (95% CI)</b>     | 1.18 (0.62, 2.25) | 1.58 (0.66, 3.79) | 0.85 (0.39, 1.86) | 1.44 (0.73, 2.84) | 0.57 (0.13, 2.56) | 3.37 (0.79, 14.46) | 0.88 (0.34, 2.29) |
|         |            | <b>p-value</b>         | 0.6               | 0.3               | 0.7               | 0.3               | 0.5               | 0.1                | 0.8               |
| ALDH1A2 | rs4646645  | <b>MAF<sup>a</sup></b> | 0.45/0.48         | 0.54/0.49         | 0.47/0.50         | 0.47/0.50         | 0.47/0.50         | 0.43/0.49          | 0.53/0.49         |
|         |            | <b>OR (95% CI)</b>     | 0.76 (0.51, 1.12) | 0.84 (0.48, 1.46) | 1.10 (0.70, 1.72) | 1.16 (0.77, 1.76) | 1.22 (0.61, 2.45) | 0.77 (0.44, 1.37)  | 0.97 (0.58, 1.63) |
|         |            | <b>p-value</b>         | 0.2               | 0.5               | 0.7               | 0.5               | 0.6               | 0.4                | 0.9               |
| ALDH1A3 | rs1130738  | <b>MAF<sup>a</sup></b> | 0.45/0.46         | 0.36/0.46         | 0.52/0.44         | 0.46/0.45         | 0.58/0.44         | 0.43/0.46          | 0.40/0.46         |
|         |            | <b>OR (95% CI)</b>     | 0.97 (0.66, 1.42) | 0.64 (0.36, 1.14) | 1.38 (0.88, 2.16) | 1.05 (0.69, 1.60) | 1.77 (0.88, 3.54) | 1.11 (0.64, 1.91)  | 0.79 (0.47, 1.32) |
|         |            | <b>p-value</b>         | 0.9               | 0.1               | 0.2               | 0.8               | 0.1               | 0.7                | 0.4               |
| ALDH1A3 | rs11854028 | <b>MAF<sup>a</sup></b> | 0.45/0.46         | 0.34/0.47         | 0.54/0.44         | 0.46/0.46         | 0.56/0.45         | 0.47/0.46          | 0.40/0.47         |
|         |            | <b>OR (95% CI)</b>     | 0.99 (0.68, 1.46) | 0.58 (0.32, 1.04) | 1.51 (0.96, 2.37) | 1.00 (0.66, 1.51) | 1.50 (0.76, 2.93) | 0.98 (0.57, 1.67)  | 0.78 (0.47, 1.30) |
|         |            | <b>p-value</b>         | 1.0               | 0.1               | 0.1               | 1.0               | 0.2               | 0.9                | 0.3               |
| ALDH1A3 | rs14226    | <b>MAF<sup>a</sup></b> | 0.21/0.19         | 0.21/0.19         | 0.19/0.19         | 0.19/0.19         | 0.17/0.19         | 0.19/0.19          | 0.17/0.20         |
|         |            | <b>OR (95% CI)</b>     | 1.22 (0.75, 2.00) | 1.17 (0.60, 2.30) | 1.02 (0.57, 1.82) | 0.97 (0.57, 1.66) | 0.76 (0.30, 1.93) | 1.02 (0.51, 2.06)  | 0.71 (0.35, 1.46) |
|         |            | <b>p-value</b>         | 0.4               | 0.6               | 0.9               | 0.9               | 0.6               | 0.9                | 0.4               |
| ALDH1A3 | rs4646678  | <b>MAF<sup>a</sup></b> | 0.20/0.18         | 0.20/0.18         | 0.18/0.19         | 0.19/0.18         | 0.17/0.19         | 0.17/0.19          | 0.18/0.19         |
|         |            | <b>OR (95% CI)</b>     | 1.15 (0.70, 1.87) | 1.08 (0.54, 2.14) | 0.99 (0.55, 1.77) | 1.03 (0.60, 1.74) | 0.81 (0.33, 2.01) | 1.11 (0.54, 2.26)  | 0.87 (0.44, 1.70) |
|         |            | <b>p-value</b>         | 0.6               | 0.8               | 1.0               | 0.9               | 0.6               | 0.8                | 0.7               |

|         |            |                        |                   |                   |                   |                   |                   |                   |                   |
|---------|------------|------------------------|-------------------|-------------------|-------------------|-------------------|-------------------|-------------------|-------------------|
| ALDH1A3 | rs7182884  | <b>MAF<sup>a</sup></b> | 0.31/0.33         | 0.36/0.32         | 0.27/0.33         | 0.30/0.33         | 0.25/0.33         | 0.38/0.32         | 0.39/0.31         |
|         |            | <b>OR (95% CI)</b>     | 1.01 (0.66, 1.53) | 1.19 (0.67, 2.12) | 0.80 (0.49, 1.33) | 0.92 (0.59, 1.45) | 0.59 (0.27, 1.28) | 0.81 (0.47, 1.40) | 1.25 (0.74, 2.12) |
|         |            | <b>p-value</b>         | 1.0               | 0.6               | 0.4               | 0.7               | 0.2               | 0.4               | 0.4               |
| ALDH1B1 | rs10738997 | <b>MAF<sup>a</sup></b> | 0.33/0.31         | 0.36/0.31         | 0.27/0.32         | 0.33/0.31         | 0.22/0.32         | 0.33/0.31         | 0.33/0.31         |
|         |            | <b>OR (95% CI)</b>     | 1.05 (0.70, 1.58) | 1.21 (0.69, 2.13) | 0.71 (0.43, 1.18) | 1.04 (0.68, 1.61) | 0.70 (0.32, 1.54) | 0.88 (0.49, 1.57) | 1.27 (0.75, 2.14) |
|         |            | <b>p-value</b>         | 0.8               | 0.5               | 0.2               | 0.8               | 0.4               | 0.7               | 0.4               |
| ALDH1B1 | rs2073478  | <b>MAF<sup>a</sup></b> | 0.50/0.45         | 0.48/0.46         | 0.39/0.47         | 0.41/0.47         | 0.47/0.46         | 0.48/0.45         | 0.47/0.46         |
|         |            | <b>OR (95% CI)</b>     | 1.16 (0.79, 1.69) | 1.13 (0.66, 1.93) | 0.66 (0.42, 1.06) | 0.77 (0.51, 1.18) | 1.15 (0.60, 2.20) | 0.74 (0.43, 1.27) | 1.09 (0.67, 1.77) |
|         |            | <b>p-value</b>         | 0.5               | 0.7               | 0.1               | 0.2               | 0.7               | 0.3               | 0.7               |
| ALDH1B1 | rs3043     | <b>MAF<sup>a</sup></b> | 0.29/0.26         | 0.29/0.26         | 0.21/0.28         | 0.21/0.28         | 0.28/0.26         | 0.34/0.26         | 0.28/0.26         |
|         |            | <b>OR (95% CI)</b>     | 1.11 (0.72, 1.71) | 1.17 (0.63, 2.16) | 0.66 (0.38, 1.14) | 0.68 (0.41, 1.13) | 1.17 (0.55, 2.48) | 0.64 (0.35, 1.15) | 1.12 (0.63, 1.97) |
|         |            | <b>p-value</b>         | 0.6               | 0.6               | 0.1               | 0.1               | 0.7               | 0.1               | 0.7               |
| ALDH1B1 | rs4242647  | <b>MAF<sup>a</sup></b> | 0.20/0.19         | 0.21/0.19         | 0.20/0.19         | 0.22/0.18         | 0.14/0.20         | 0.17/0.19         | 0.15/0.20         |
|         |            | <b>OR (95% CI)</b>     | 1.00 (0.61, 1.65) | 1.12 (0.57, 2.21) | 1.01 (0.57, 1.80) | 1.20 (0.72, 2.01) | 0.75 (0.29, 1.96) | 1.09 (0.53, 2.26) | 0.86 (0.43, 1.72) |
|         |            | <b>p-value</b>         | 1.0               | 0.7               | 1.0               | 0.5               | 0.6               | 0.8               | 0.7               |
| ALDH1B1 | rs4878802  | <b>MAF<sup>a</sup></b> | 0.32/0.29         | 0.36/0.29         | 0.26/0.30         | 0.30/0.29         | 0.19/0.30         | 0.31/0.29         | 0.29/0.30         |
|         |            | <b>OR (95% CI)</b>     | 1.08 (0.71, 1.65) | 1.36 (0.76, 2.44) | 0.74 (0.44, 1.24) | 1.00 (0.64, 1.56) | 0.65 (0.28, 1.49) | 0.83 (0.45, 1.52) | 1.11 (0.64, 1.92) |
|         |            | <b>p-value</b>         | 0.7               | 0.3               | 0.3               | 1.0               | 0.3               | 0.5               | 0.7               |
| ALDH1B1 | rs4878803  | <b>MAF<sup>a</sup></b> | 0.23/0.20         | 0.23/0.21         | 0.22/0.21         | 0.20/0.22         | 0.14/0.22         | 0.22/0.21         | 0.19/0.21         |
|         |            | <b>OR (95% CI)</b>     | 1.11 (0.69, 1.77) | 1.12 (0.58, 2.18) | 0.99 (0.57, 1.71) | 0.85 (0.50, 1.43) | 0.71 (0.27, 1.86) | 0.85 (0.44, 1.66) | 1.10 (0.58, 2.07) |
|         |            | <b>p-value</b>         | 0.7               | 0.7               | 1.0               | 0.5               | 0.5               | 0.6               | 0.8               |
| ALDH1B1 | rs4878804  | <b>MAF<sup>a</sup></b> | 0.19/0.18         | 0.23/0.18         | 0.17/0.18         | 0.19/0.18         | 0.14/0.18         | 0.17/0.18         | 0.17/0.18         |
|         |            | <b>OR (95% CI)</b>     | 1.05 (0.64, 1.73) | 1.35 (0.70, 2.61) | 0.87 (0.48, 1.58) | 0.99 (0.58, 1.69) | 0.78 (0.30, 2.03) | 1.01 (0.49, 2.08) | 1.02 (0.53, 1.97) |
|         |            | <b>p-value</b>         | 0.8               | 0.4               | 0.6               | 1.0               | 0.6               | 1.0               | 1.0               |
| ALDH1B1 | rs7040397  | <b>MAF<sup>a</sup></b> | 0.26/0.21         | 0.23/0.22         | 0.21/0.22         | 0.21/0.22         | 0.14/0.22         | 0.22/0.22         | 0.21/0.22         |
|         |            | <b>OR (95% CI)</b>     | 1.24 (0.79, 1.96) | 1.08 (0.56, 2.09) | 0.87 (0.50, 1.52) | 0.87 (0.52, 1.45) | 0.67 (0.26, 1.75) | 0.90 (0.46, 1.75) | 1.13 (0.62, 2.08) |
|         |            | <b>p-value</b>         | 0.4               | 0.8               | 0.6               | 0.6               | 0.4               | 0.8               | 0.7               |
| ALDH1L1 | rs11715574 | <b>MAF<sup>a</sup></b> | 0.20/0.21         | 0.29/0.20         | 0.22/0.21         | 0.24/0.20         | 0.11/0.22         | 0.22/0.21         | 0.15/0.22         |
|         |            | <b>OR (95% CI)</b>     | 0.84 (0.51, 1.38) | 1.53 (0.80, 2.91) | 0.99 (0.57, 1.73) | 1.17 (0.70, 1.96) | 0.54 (0.18, 1.58) | 0.85 (0.44, 1.65) | 0.84 (0.41, 1.70) |
|         |            | <b>p-value</b>         | 0.5               | 0.2               | 1.0               | 0.5               | 0.3               | 0.6               | 0.6               |
| ALDH1L1 | rs12636371 | <b>MAF<sup>a</sup></b> | 0.45/0.39         | 0.29/0.42         | 0.43/0.40         | 0.47/0.39         | 0.39/0.41         | 0.36/0.41         | 0.32/0.42         |
|         |            | <b>OR (95% CI)</b>     | 1.30 (0.87, 1.94) | 0.50 (0.26, 0.95) | 1.13 (0.71, 1.81) | 1.39 (0.91, 2.14) | 0.92 (0.47, 1.83) | 1.29 (0.72, 2.32) | 0.67 (0.40, 1.14) |
|         |            | <b>p-value</b>         | 0.2               | 0.0               | 0.6               | 0.1               | 0.8               | 0.4               | 0.1               |
| ALDH1L1 | rs12638724 | <b>MAF<sup>a</sup></b> | 0.50/0.43         | 0.48/0.44         | 0.38/0.46         | 0.45/0.45         | 0.47/0.45         | 0.48/0.44         | 0.38/0.46         |
|         |            | <b>OR (95% CI)</b>     | 1.40 (0.91, 2.14) | 1.19 (0.66, 2.16) | 0.68 (0.42, 1.13) | 0.99 (0.63, 1.55) | 1.09 (0.52, 2.27) | 0.82 (0.45, 1.49) | 0.60 (0.34, 1.07) |
|         |            | <b>p-value</b>         | 0.1               | 0.6               | 0.1               | 1.0               | 0.8               | 0.5               | 0.1               |
| ALDH1L1 | rs13060596 | <b>MAF<sup>a</sup></b> | 0.39/0.33         | 0.23/0.36         | 0.38/0.34         | 0.41/0.33         | 0.31/0.35         | 0.26/0.35         | 0.26/0.36         |
|         |            | <b>OR (95% CI)</b>     | 1.36 (0.91, 2.04) | 0.51 (0.26, 0.99) | 1.21 (0.76, 1.95) | 1.43 (0.93, 2.20) | 0.81 (0.39, 1.67) | 1.65 (0.88, 3.12) | 0.65 (0.37, 1.14) |
|         |            | <b>p-value</b>         | 0.1               | 0.0               | 0.4               | 0.1               | 0.6               | 0.1               | 0.1               |
| ALDH1L1 | rs1868138  | <b>MAF<sup>a</sup></b> | 0.21/0.26         | 0.34/0.24         | 0.21/0.26         | 0.29/0.24         | 0.19/0.25         | 0.24/0.25         | 0.28/0.25         |
|         |            | <b>OR (95% CI)</b>     | 0.69 (0.42, 1.12) | 1.72 (0.92, 3.19) | 0.70 (0.40, 1.24) | 1.31 (0.81, 2.11) | 0.80 (0.34, 1.90) | 0.97 (0.50, 1.88) | 1.32 (0.73, 2.39) |
|         |            | <b>p-value</b>         | 0.1               | 0.1               | 0.2               | 0.3               | 0.6               | 0.9               | 0.4               |
| ALDH1L1 | rs2003334  | <b>MAF<sup>a</sup></b> | 0.36/0.37         | 0.41/0.36         | 0.31/0.38         | 0.38/0.37         | 0.36/0.37         | 0.45/0.36         | 0.38/0.37         |
|         |            | <b>OR (95% CI)</b>     | 0.92 (0.61, 1.40) | 1.18 (0.66, 2.12) | 0.72 (0.44, 1.19) | 0.99 (0.63, 1.53) | 0.98 (0.48, 2.00) | 0.63 (0.35, 1.13) | 1.04 (0.61, 1.79) |
|         |            | <b>p-value</b>         | 0.7               | 0.6               | 0.2               | 0.9               | 1.0               | 0.1               | 0.9               |

|         |            |                                                          |                                       |                                       |                                       |                                       |                                       |                                       |                                       |
|---------|------------|----------------------------------------------------------|---------------------------------------|---------------------------------------|---------------------------------------|---------------------------------------|---------------------------------------|---------------------------------------|---------------------------------------|
| ALDH1L1 | rs2044576  | MAF <sup>a</sup><br><b>OR (95% CI)</b><br><b>p-value</b> | 0.10/0.06<br>1.51 (0.74, 3.05)<br>0.3 | 0.09/0.07<br>1.23 (0.45, 3.35)<br>0.7 | 0.06/0.07<br>0.65 (0.24, 1.74)<br>0.4 | 0.05/0.08<br>0.59 (0.23, 1.48)<br>0.3 | 0.08/0.07<br>1.51 (0.44, 5.24)<br>0.5 | 0.07/0.07<br>0.89 (0.30, 2.65)<br>0.8 | 0.06/0.07<br>0.99 (0.34, 2.93)<br>1.0 |
| ALDH1L1 | rs2290053  | MAF <sup>a</sup><br><b>OR (95% CI)</b><br><b>p-value</b> | 0.48/0.44<br>1.42 (0.92, 2.18)<br>0.1 | 0.48/0.46<br>1.14 (0.63, 2.08)<br>0.7 | 0.40/0.47<br>0.72 (0.44, 1.19)<br>0.2 | 0.46/0.46<br>0.98 (0.62, 1.53)<br>0.9 | 0.47/0.46<br>1.06 (0.51, 2.20)<br>0.9 | 0.50/0.45<br>0.77 (0.42, 1.40)<br>0.4 | 0.39/0.47<br>0.61 (0.35, 1.09)<br>0.1 |
| ALDH1L1 | rs3772411  | MAF <sup>a</sup><br><b>OR (95% CI)</b><br><b>p-value</b> | 0.27/0.27<br>1.05 (0.66, 1.68)<br>0.8 | 0.27/0.27<br>0.96 (0.49, 1.88)<br>0.9 | 0.28/0.27<br>1.09 (0.64, 1.86)<br>0.8 | 0.29/0.27<br>1.14 (0.69, 1.87)<br>0.6 | 0.25/0.27<br>0.78 (0.34, 1.80)<br>0.6 | 0.28/0.27<br>1.04 (0.54, 1.99)<br>0.9 | 0.25/0.28<br>0.78 (0.42, 1.44)<br>0.4 |
| ALDH1L1 | rs3772426  | MAF <sup>a</sup><br><b>OR (95% CI)</b><br><b>p-value</b> | 0.34/0.29<br>1.34 (0.86, 2.10)<br>0.2 | 0.27/0.31<br>0.80 (0.41, 1.57)<br>0.5 | 0.27/0.31<br>0.82 (0.48, 1.40)<br>0.5 | 0.30/0.30<br>1.03 (0.63, 1.68)<br>0.9 | 0.25/0.31<br>0.69 (0.30, 1.56)<br>0.4 | 0.31/0.30<br>0.96 (0.52, 1.80)<br>0.9 | 0.33/0.30<br>1.06 (0.59, 1.90)<br>0.8 |
| ALDH1L1 | rs3816366  | MAF <sup>a</sup><br><b>OR (95% CI)</b><br><b>p-value</b> | 0.35/0.36<br>0.94 (0.61, 1.45)<br>0.8 | 0.23/0.37<br>0.50 (0.25, 0.99)<br>0.0 | 0.41/0.35<br>1.37 (0.83, 2.24)<br>0.2 | 0.34/0.37<br>0.93 (0.58, 1.49)<br>0.8 | 0.42/0.36<br>1.28 (0.61, 2.67)<br>0.5 | 0.28/0.37<br>1.69 (0.89, 3.21)<br>0.1 | 0.49/0.34<br>1.91 (1.08, 3.38)<br>0.0 |
| ALDH1L1 | rs4646715  | MAF <sup>a</sup><br><b>OR (95% CI)</b><br><b>p-value</b> | 0.44/0.36<br>1.37 (0.90, 2.10)<br>0.1 | 0.41/0.38<br>1.15 (0.63, 2.11)<br>0.6 | 0.39/0.38<br>1.00 (0.61, 1.63)<br>1.0 | 0.36/0.39<br>0.84 (0.53, 1.33)<br>0.5 | 0.33/0.38<br>0.84 (0.39, 1.81)<br>0.7 | 0.34/0.39<br>1.16 (0.63, 2.13)<br>0.6 | 0.33/0.39<br>0.80 (0.45, 1.42)<br>0.5 |
| ALDH1L1 | rs4646717  | MAF <sup>a</sup><br><b>OR (95% CI)</b><br><b>p-value</b> | 0.43/0.37<br>1.29 (0.85, 1.97)<br>0.2 | 0.41/0.38<br>1.14 (0.63, 2.08)<br>0.7 | 0.39/0.38<br>0.99 (0.61, 1.61)<br>1.0 | 0.37/0.39<br>0.87 (0.55, 1.38)<br>0.6 | 0.33/0.39<br>0.84 (0.39, 1.78)<br>0.6 | 0.34/0.39<br>1.17 (0.64, 2.14)<br>0.6 | 0.35/0.39<br>0.86 (0.49, 1.51)<br>0.6 |
| ALDH1L1 | rs4646739  | MAF <sup>a</sup><br><b>OR (95% CI)</b><br><b>p-value</b> | 0.43/0.43<br>1.04 (0.68, 1.58)<br>0.9 | 0.27/0.45<br>0.42 (0.22, 0.82)<br>0.0 | 0.47/0.42<br>1.26 (0.78, 2.04)<br>0.4 | 0.45/0.43<br>1.15 (0.74, 1.78)<br>0.5 | 0.44/0.43<br>1.00 (0.48, 2.09)<br>1.0 | 0.34/0.44<br>1.70 (0.91, 3.18)<br>0.1 | 0.54/0.41<br>1.77 (1.01, 3.13)<br>0.0 |
| ALDH1L1 | rs4646745  | MAF <sup>a</sup><br><b>OR (95% CI)</b><br><b>p-value</b> | 0.20/0.23<br>0.88 (0.54, 1.46)<br>0.6 | 0.29/0.22<br>1.45 (0.76, 2.79)<br>0.3 | 0.28/0.21<br>1.51 (0.88, 2.60)<br>0.1 | 0.20/0.23<br>0.81 (0.47, 1.39)<br>0.4 | 0.17/0.23<br>0.62 (0.24, 1.58)<br>0.3 | 0.22/0.22<br>1.08 (0.54, 2.15)<br>0.8 | 0.21/0.23<br>0.90 (0.47, 1.73)<br>0.8 |
| ALDH1L1 | rs4646755  | MAF <sup>a</sup><br><b>OR (95% CI)</b><br><b>p-value</b> | 0.23/0.24<br>1.02 (0.63, 1.66)<br>0.9 | 0.23/0.24<br>0.93 (0.46, 1.86)<br>0.8 | 0.19/0.25<br>0.72 (0.40, 1.32)<br>0.3 | 0.25/0.24<br>1.04 (0.62, 1.75)<br>0.9 | 0.25/0.24<br>0.94 (0.41, 2.11)<br>0.9 | 0.36/0.23<br>0.45 (0.23, 0.86)<br>0.0 | 0.21/0.24<br>0.73 (0.38, 1.38)<br>0.3 |
| ALDH1L1 | rs4646761  | MAF <sup>a</sup><br><b>OR (95% CI)</b><br><b>p-value</b> | 0.40/0.44<br>0.78 (0.51, 1.19)<br>0.3 | 0.56/0.42<br>1.82 (0.99, 3.31)<br>0.1 | 0.38/0.44<br>0.69 (0.42, 1.14)<br>0.1 | 0.44/0.43<br>0.94 (0.60, 1.47)<br>0.8 | 0.44/0.43<br>1.22 (0.60, 2.47)<br>0.6 | 0.48/0.43<br>0.69 (0.39, 1.23)<br>0.2 | 0.42/0.43<br>1.05 (0.61, 1.80)<br>0.9 |
| ALDH1L1 | rs6774437  | MAF <sup>a</sup><br><b>OR (95% CI)</b><br><b>p-value</b> | 0.49/0.49<br>0.92 (0.61, 1.40)<br>0.7 | 0.59/0.49<br>0.63 (0.35, 1.15)<br>0.1 | 0.43/0.51<br>1.38 (0.85, 2.25)<br>0.2 | 0.51/0.49<br>0.94 (0.60, 1.45)<br>0.8 | 0.47/0.50<br>1.16 (0.56, 2.37)<br>0.7 | 0.40/0.48<br>1.74 (0.96, 3.16)<br>0.1 | 0.39/0.51<br>1.91 (1.08, 3.37)<br>0.0 |
| ALDH1L1 | rs7639966  | MAF <sup>a</sup><br><b>OR (95% CI)</b><br><b>p-value</b> | 0.36/0.40<br>0.83 (0.54, 1.29)<br>0.4 | 0.32/0.40<br>0.72 (0.38, 1.37)<br>0.3 | 0.42/0.38<br>1.29 (0.78, 2.13)<br>0.3 | 0.37/0.40<br>0.92 (0.58, 1.48)<br>0.7 | 0.44/0.39<br>1.16 (0.55, 2.44)<br>0.7 | 0.38/0.39<br>1.12 (0.61, 2.05)<br>0.7 | 0.49/0.38<br>1.44 (0.82, 2.52)<br>0.2 |
| ALDH1L1 | rs9847790  | MAF <sup>a</sup><br><b>OR (95% CI)</b><br><b>p-value</b> | 0.17/0.20<br>0.75 (0.44, 1.28)<br>0.3 | 0.25/0.19<br>1.58 (0.78, 3.20)<br>0.2 | 0.22/0.19<br>1.15 (0.64, 2.06)<br>0.6 | 0.20/0.20<br>1.00 (0.57, 1.74)<br>1.0 | 0.17/0.20<br>0.88 (0.34, 2.32)<br>0.8 | 0.17/0.20<br>1.15 (0.53, 2.46)<br>0.7 | 0.21/0.20<br>1.16 (0.59, 2.29)<br>0.7 |
| ALDH1L2 | rs10459204 | MAF <sup>a</sup><br><b>OR (95% CI)</b><br><b>p-value</b> | 0.13/0.15<br>0.89 (0.51, 1.58)<br>0.7 | 0.07/0.15<br>0.42 (0.15, 1.22)<br>0.1 | 0.17/0.14<br>1.29 (0.70, 2.38)<br>0.4 | 0.15/0.14<br>1.13 (0.63, 2.02)<br>0.7 | 0.17/0.14<br>1.09 (0.44, 2.71)<br>0.8 | 0.19/0.14<br>0.73 (0.36, 1.46)<br>0.4 | 0.14/0.14<br>0.85 (0.41, 1.76)<br>0.7 |
| ALDH1L2 | rs10746009 | MAF <sup>a</sup>                                         | 0.40/0.38                             | 0.39/0.38                             | 0.41/0.38                             | 0.37/0.39                             | 0.42/0.38                             | 0.43/0.38                             | 0.27/0.40                             |

|         |            |                        |                   |                   |                   |                   |                   |                   |                   |
|---------|------------|------------------------|-------------------|-------------------|-------------------|-------------------|-------------------|-------------------|-------------------|
|         |            | <b>OR (95% CI)</b>     | 1.10 (0.72, 1.67) | 1.01 (0.55, 1.86) | 1.14 (0.70, 1.85) | 0.86 (0.54, 1.37) | 1.25 (0.61, 2.58) | 0.74 (0.41, 1.33) | 0.55 (0.30, 0.99) |
|         |            | <b>p-value</b>         | 0.7               | 1.0               | 0.6               | 0.5               | 0.5               | 0.3               | 0.0               |
| ALDH1L2 | rs10778364 | <b>MAF<sup>a</sup></b> | 0.43/0.44         | 0.39/0.44         | 0.40/0.45         | 0.47/0.43         | 0.33/0.45         | 0.41/0.44         | 0.56/0.42         |
|         |            | <b>OR (95% CI)</b>     | 1.01 (0.68, 1.51) | 0.82 (0.45, 1.48) | 0.88 (0.55, 1.42) | 1.23 (0.80, 1.89) | 0.56 (0.27, 1.14) | 1.14 (0.64, 2.02) | 1.55 (0.94, 2.57) |
|         |            | <b>p-value</b>         | 1.0               | 0.5               | 0.6               | 0.4               | 0.1               | 0.7               | 0.1               |
| ALDH1L2 | rs10861327 | <b>MAF<sup>a</sup></b> | 0.48/0.42         | 0.41/0.44         | 0.36/0.45         | 0.46/0.43         | 0.56/0.43         | 0.47/0.43         | 0.33/0.45         |
|         |            | <b>OR (95% CI)</b>     | 1.39 (0.94, 2.07) | 0.87 (0.49, 1.53) | 0.73 (0.45, 1.16) | 1.10 (0.72, 1.68) | 1.44 (0.74, 2.80) | 0.90 (0.52, 1.57) | 0.56 (0.33, 0.95) |
|         |            | <b>p-value</b>         | 0.1               | 0.6               | 0.2               | 0.7               | 0.3               | 0.7               | 0.0               |
| ALDH1L2 | rs12372293 | <b>MAF<sup>a</sup></b> | 0.11/0.10         | 0.11/0.10         | 0.04/0.11         | 0.12/0.10         | 0.17/0.10         | 0.10/0.10         | 0.10/0.10         |
|         |            | <b>OR (95% CI)</b>     | 1.18 (0.61, 2.27) | 1.11 (0.44, 2.77) | 0.39 (0.13, 1.13) | 1.33 (0.67, 2.62) | 1.64 (0.64, 4.20) | 1.08 (0.42, 2.75) | 0.80 (0.34, 1.91) |
|         |            | <b>p-value</b>         | 0.6               | 0.8               | 0.1               | 0.4               | 0.3               | 0.9               | 0.6               |
| ALDH1L2 | rs1345094  | <b>MAF<sup>a</sup></b> | 0.36/0.38         | 0.27/0.39         | 0.44/0.36         | 0.40/0.37         | 0.33/0.38         | 0.36/0.38         | 0.41/0.37         |
|         |            | <b>OR (95% CI)</b>     | 0.89 (0.60, 1.34) | 0.55 (0.29, 1.03) | 1.33 (0.85, 2.11) | 1.08 (0.71, 1.66) | 0.89 (0.44, 1.81) | 1.01 (0.57, 1.78) | 1.31 (0.79, 2.18) |
|         |            | <b>p-value</b>         | 0.6               | 0.1               | 0.2               | 0.7               | 0.8               | 1.0               | 0.3               |
| ALDH1L2 | rs2374449  | <b>MAF<sup>a</sup></b> | 0.14/0.18         | 0.11/0.18         | 0.23/0.16         | 0.17/0.17         | 0.14/0.17         | 0.12/0.18         | 0.26/0.16         |
|         |            | <b>OR (95% CI)</b>     | 0.79 (0.46, 1.37) | 0.50 (0.20, 1.24) | 1.71 (0.97, 2.99) | 0.94 (0.53, 1.64) | 0.72 (0.27, 1.89) | 1.60 (0.68, 3.76) | 1.96 (1.07, 3.58) |
|         |            | <b>p-value</b>         | 0.4               | 0.1               | 0.1               | 0.8               | 0.5               | 0.3               | 0.0               |
| ALDH1L2 | rs7299166  | <b>MAF<sup>a</sup></b> | 0.20/0.25         | 0.20/0.25         | 0.30/0.23         | 0.24/0.24         | 0.19/0.24         | 0.17/0.25         | 0.36/0.22         |
|         |            | <b>OR (95% CI)</b>     | 0.76 (0.48, 1.23) | 0.72 (0.36, 1.44) | 1.46 (0.89, 2.39) | 0.97 (0.60, 1.57) | 0.73 (0.32, 1.69) | 1.56 (0.77, 3.17) | 2.00 (1.17, 3.41) |
|         |            | <b>p-value</b>         | 0.3               | 0.4               | 0.1               | 0.9               | 0.5               | 0.2               | 0.0               |
| ALDH1L2 | rs7954946  | <b>MAF<sup>a</sup></b> | 0.43/0.48         | 0.41/0.47         | 0.56/0.45         | 0.47/0.47         | 0.39/0.47         | 0.43/0.47         | 0.54/0.46         |
|         |            | <b>OR (95% CI)</b>     | 0.78 (0.52, 1.16) | 0.75 (0.42, 1.34) | 1.44 (0.90, 2.28) | 0.99 (0.65, 1.51) | 0.81 (0.40, 1.61) | 1.10 (0.63, 1.94) | 1.62 (0.97, 2.70) |
|         |            | <b>p-value</b>         | 0.2               | 0.3               | 0.1               | 1.0               | 0.5               | 0.7               | 0.1               |
| ALDH2   | rs10744777 | <b>MAF<sup>a</sup></b> | 0.44/0.44         | 0.52/0.43         | 0.50/0.43         | 0.48/0.43         | 0.31/0.45         | 0.31/0.46         | 0.41/0.45         |
|         |            | <b>OR (95% CI)</b>     | 0.84 (0.53, 1.32) | 1.51 (0.81, 2.82) | 1.13 (0.67, 1.90) | 1.23 (0.76, 1.97) | 0.68 (0.31, 1.50) | 2.00 (1.04, 3.86) | 1.18 (0.66, 2.12) |
|         |            | <b>p-value</b>         | 0.4               | 0.2               | 0.7               | 0.4               | 0.3               | 0.0               | 0.6               |
| ALDH2   | rs16941669 | <b>MAF<sup>a</sup></b> | 0.10/0.08         | 0.14/0.08         | 0.07/0.09         | 0.07/0.09         | 0.08/0.09         | 0.09/0.09         | 0.07/0.09         |
|         |            | <b>OR (95% CI)</b>     | 1.26 (0.63, 2.53) | 1.93 (0.81, 4.59) | 0.74 (0.30, 1.85) | 0.72 (0.32, 1.63) | 0.85 (0.24, 2.99) | 1.01 (0.36, 2.79) | 0.65 (0.23, 1.81) |
|         |            | <b>p-value</b>         | 0.5               | 0.1               | 0.5               | 0.4               | 0.8               | 1.0               | 0.4               |
| CYP1A2  | rs2470890  | <b>MAF<sup>a</sup></b> | 0.49/0.47         | 0.57/0.47         | 0.47/0.48         | 0.46/0.48         | 0.42/0.48         | 0.45/0.48         | 0.43/0.49         |
|         |            | <b>OR (95% CI)</b>     | 1.04 (0.69, 1.56) | 1.52 (0.86, 2.68) | 0.80 (0.49, 1.28) | 0.87 (0.57, 1.35) | 1.00 (0.51, 1.98) | 1.06 (0.61, 1.85) | 1.05 (0.63, 1.77) |
|         |            | <b>p-value</b>         | 0.9               | 0.2               | 0.3               | 0.5               | 1.0               | 0.8               | 0.8               |
| CYP1A2  | rs2472304  | <b>MAF<sup>a</sup></b> | 0.50/0.47         | 0.57/0.47         | 0.47/0.48         | 0.46/0.48         | 0.42/0.48         | 0.46/0.48         | 0.43/0.49         |
|         |            | <b>OR (95% CI)</b>     | 1.00 (0.66, 1.50) | 1.54 (0.86, 2.76) | 0.80 (0.49, 1.29) | 0.88 (0.57, 1.36) | 1.00 (0.51, 1.98) | 1.00 (0.57, 1.75) | 1.05 (0.62, 1.76) |
|         |            | <b>p-value</b>         | 1.0               | 0.1               | 0.4               | 0.6               | 1.0               | 1.0               | 0.9               |
| CYP1A2  | rs762551   | <b>MAF<sup>a</sup></b> | 0.30/0.34         | 0.39/0.32         | 0.32/0.33         | 0.31/0.33         | 0.31/0.33         | 0.34/0.33         | 0.33/0.33         |
|         |            | <b>OR (95% CI)</b>     | 0.82 (0.53, 1.27) | 1.38 (0.77, 2.47) | 0.92 (0.56, 1.52) | 0.89 (0.56, 1.41) | 0.98 (0.47, 2.05) | 0.88 (0.49, 1.59) | 1.16 (0.67, 2.01) |
|         |            | <b>p-value</b>         | 0.4               | 0.3               | 0.8               | 0.6               | 1.0               | 0.7               | 0.6               |
| CYP2B6  | rs7250601  | <b>MAF<sup>a</sup></b> | 0.20/0.24         | 0.30/0.23         | 0.24/0.23         | 0.29/0.22         | 0.19/0.24         | 0.28/0.23         | 0.14/0.25         |
|         |            | <b>OR (95% CI)</b>     | 0.76 (0.47, 1.23) | 1.57 (0.86, 2.87) | 1.00 (0.59, 1.69) | 1.50 (0.94, 2.40) | 0.85 (0.37, 1.95) | 0.83 (0.45, 1.51) | 0.49 (0.24, 1.02) |
|         |            | <b>p-value</b>         | 0.3               | 0.1               | 1.0               | 0.1               | 0.7               | 0.5               | 0.1               |
| CYP2C8  | rs10509681 | <b>MAF<sup>a</sup></b> | 0.05/0.09         | 0.07/0.08         | 0.11/0.07         | 0.11/0.07         | 0.03/0.08         | 0.10/0.08         | 0.07/0.08         |
|         |            | <b>OR (95% CI)</b>     | 0.52 (0.22, 1.25) | 0.93 (0.32, 2.69) | 1.71 (0.81, 3.58) | 1.59 (0.79, 3.18) | 0.30 (0.04, 2.15) | 0.71 (0.28, 1.78) | 0.72 (0.28, 1.84) |
|         |            | <b>p-value</b>         | 0.1               | 0.9               | 0.2               | 0.2               | 0.2               | 0.5               | 0.5               |
| CYP2C8  | rs1058932  | <b>MAF<sup>a</sup></b> | 0.27/0.19         | 0.14/0.22         | 0.23/0.21         | 0.22/0.21         | 0.17/0.21         | 0.19/0.21         | 0.14/0.22         |

|        |            |                        |                   |                   |                   |                   |                   |                   |                   |
|--------|------------|------------------------|-------------------|-------------------|-------------------|-------------------|-------------------|-------------------|-------------------|
|        |            | <b>OR (95% CI)</b>     | 1.45 (0.91, 2.32) | 0.58 (0.26, 1.28) | 1.09 (0.63, 1.89) | 1.07 (0.64, 1.78) | 0.84 (0.33, 2.13) | 1.08 (0.53, 2.18) | 0.59 (0.27, 1.25) |
|        |            | <b>p-value</b>         | 0.1               | 0.2               | 0.8               | 0.8               | 0.7               | 0.8               | 0.2               |
| CYP2C8 | rs11188156 | <b>MAF<sup>a</sup></b> | 0.36/0.33         | 0.25/0.35         | 0.44/0.32         | 0.37/0.33         | 0.28/0.34         | 0.29/0.34         | 0.26/0.35         |
|        |            | <b>OR (95% CI)</b>     | 1.07 (0.71, 1.62) | 0.62 (0.33, 1.18) | 1.68 (1.05, 2.69) | 1.15 (0.74, 1.79) | 0.76 (0.35, 1.66) | 1.20 (0.65, 2.20) | 0.60 (0.32, 1.09) |
|        |            | <b>p-value</b>         | 0.8               | 0.1               | 0.0               | 0.5               | 0.5               | 0.6               | 0.1               |
| CYP2C8 | rs11572126 | <b>MAF<sup>a</sup></b> | 0.17/0.10         | 0.07/0.12         | 0.07/0.13         | 0.12/0.12         | 0.11/0.12         | 0.16/0.11         | 0.10/0.12         |
|        |            | <b>OR (95% CI)</b>     | 1.88 (1.08, 3.26) | 0.53 (0.19, 1.52) | 0.49 (0.20, 1.16) | 0.92 (0.49, 1.76) | 0.92 (0.32, 2.68) | 0.70 (0.32, 1.49) | 0.78 (0.33, 1.85) |
|        |            | <b>p-value</b>         | 0.0               | 0.2               | 0.1               | 0.8               | 0.9               | 0.4               | 0.6               |
| CYP2C8 | rs11572174 | <b>MAF<sup>a</sup></b> | 0.05/0.09         | 0.07/0.08         | 0.11/0.07         | 0.11/0.07         | 0.03/0.08         | 0.10/0.08         | 0.07/0.08         |
|        |            | <b>OR (95% CI)</b>     | 0.52 (0.22, 1.25) | 0.93 (0.32, 2.69) | 1.71 (0.81, 3.58) | 1.59 (0.79, 3.18) | 0.30 (0.04, 2.15) | 0.71 (0.28, 1.78) | 0.72 (0.28, 1.84) |
|        |            | <b>p-value</b>         | 0.1               | 0.9               | 0.2               | 0.2               | 0.2               | 0.5               | 0.5               |
| CYP2C8 | rs1891071  | <b>MAF<sup>a</sup></b> | 0.33/0.35         | 0.45/0.33         | 0.24/0.37         | 0.33/0.35         | 0.42/0.34         | 0.34/0.35         | 0.43/0.33         |
|        |            | <b>OR (95% CI)</b>     | 0.90 (0.58, 1.38) | 1.58 (0.88, 2.85) | 0.55 (0.32, 0.94) | 0.85 (0.54, 1.35) | 1.42 (0.69, 2.95) | 0.96 (0.53, 1.75) | 1.76 (1.01, 3.09) |
|        |            | <b>p-value</b>         | 0.6               | 0.1               | 0.0               | 0.5               | 0.3               | 0.9               | 0.0               |
| CYP2C8 | rs1934952  | <b>MAF<sup>a</sup></b> | 0.36/0.35         | 0.36/0.35         | 0.33/0.35         | 0.31/0.36         | 0.36/0.35         | 0.40/0.34         | 0.36/0.35         |
|        |            | <b>OR (95% CI)</b>     | 1.06 (0.70, 1.62) | 1.11 (0.61, 2.01) | 0.93 (0.57, 1.51) | 0.87 (0.55, 1.38) | 1.01 (0.48, 2.12) | 0.87 (0.49, 1.54) | 1.02 (0.58, 1.79) |
|        |            | <b>p-value</b>         | 0.8               | 0.7               | 0.8               | 0.5               | 1.0               | 0.6               | 0.9               |
| CYP2C8 | rs1934956  | <b>MAF<sup>a</sup></b> | 0.16/0.16         | 0.27/0.15         | 0.11/0.17         | 0.13/0.16         | 0.17/0.16         | 0.09/0.17         | 0.22/0.15         |
|        |            | <b>OR (95% CI)</b>     | 0.97 (0.57, 1.65) | 2.14 (1.09, 4.17) | 0.60 (0.30, 1.20) | 0.74 (0.40, 1.36) | 1.21 (0.47, 3.08) | 1.97 (0.76, 5.09) | 1.90 (0.99, 3.67) |
|        |            | <b>p-value</b>         | 0.9               | 0.0               | 0.1               | 0.3               | 0.7               | 0.2               | 0.1               |
| CYP2C8 | rs2185571  | <b>MAF<sup>a</sup></b> | 0.30/0.29         | 0.30/0.29         | 0.29/0.29         | 0.28/0.30         | 0.25/0.30         | 0.34/0.29         | 0.28/0.29         |
|        |            | <b>OR (95% CI)</b>     | 1.09 (0.69, 1.71) | 1.12 (0.59, 2.11) | 1.04 (0.62, 1.75) | 0.99 (0.60, 1.61) | 0.68 (0.30, 1.55) | 0.85 (0.47, 1.56) | 0.83 (0.45, 1.52) |
|        |            | <b>p-value</b>         | 0.7               | 0.7               | 0.9               | 1.0               | 0.4               | 0.6               | 0.5               |
| CYP2C8 | rs2275622  | <b>MAF<sup>a</sup></b> | 0.28/0.32         | 0.38/0.30         | 0.21/0.33         | 0.33/0.30         | 0.36/0.30         | 0.33/0.31         | 0.36/0.30         |
|        |            | <b>OR (95% CI)</b>     | 0.85 (0.55, 1.34) | 1.34 (0.73, 2.44) | 0.55 (0.31, 0.96) | 1.07 (0.67, 1.71) | 1.29 (0.61, 2.71) | 0.87 (0.47, 1.58) | 1.48 (0.84, 2.62) |
|        |            | <b>p-value</b>         | 0.5               | 0.3               | 0.0               | 0.8               | 0.5               | 0.6               | 0.2               |
| CYP2C9 | rs1057910  | <b>MAF<sup>a</sup></b> | 0.07/0.07         | 0.07/0.07         | 0.06/0.07         | 0.07/0.07         | 0.06/0.07         | 0.07/0.07         | 0.07/0.07         |
|        |            | <b>OR (95% CI)</b>     | 1.13 (0.51, 2.49) | 1.09 (0.36, 3.28) | 0.85 (0.31, 2.30) | 1.17 (0.51, 2.68) | 0.72 (0.16, 3.20) | 1.08 (0.35, 3.32) | 1.07 (0.39, 2.95) |
|        |            | <b>p-value</b>         | 0.8               | 0.9               | 0.8               | 0.7               | 0.7               | 0.9               | 0.9               |
| CYP2C9 | rs1934963  | <b>MAF<sup>a</sup></b> | 0.14/0.19         | 0.18/0.18         | 0.22/0.17         | 0.23/0.17         | 0.11/0.18         | 0.21/0.18         | 0.13/0.19         |
|        |            | <b>OR (95% CI)</b>     | 0.72 (0.41, 1.24) | 1.04 (0.50, 2.16) | 1.44 (0.82, 2.53) | 1.58 (0.94, 2.64) | 0.54 (0.19, 1.57) | 0.81 (0.40, 1.62) | 0.59 (0.28, 1.24) |
|        |            | <b>p-value</b>         | 0.2               | 0.9               | 0.2               | 0.1               | 0.3               | 0.5               | 0.2               |
| CYP2C9 | rs1934967  | <b>MAF<sup>a</sup></b> | 0.19/0.21         | 0.21/0.21         | 0.18/0.21         | 0.21/0.21         | 0.22/0.20         | 0.22/0.20         | 0.25/0.20         |
|        |            | <b>OR (95% CI)</b>     | 0.91 (0.55, 1.50) | 1.04 (0.53, 2.05) | 0.86 (0.47, 1.55) | 0.95 (0.57, 1.61) | 1.03 (0.45, 2.36) | 0.85 (0.44, 1.65) | 1.39 (0.75, 2.58) |
|        |            | <b>p-value</b>         | 0.7               | 0.9               | 0.6               | 0.9               | 0.9               | 0.6               | 0.3               |
| CYP2C9 | rs1934968  | <b>MAF<sup>a</sup></b> | 0.10/0.09         | 0.13/0.09         | 0.04/0.10         | 0.11/0.09         | 0.11/0.09         | 0.07/0.10         | 0.13/0.09         |
|        |            | <b>OR (95% CI)</b>     | 1.06 (0.55, 2.05) | 1.25 (0.53, 2.93) | 0.38 (0.13, 1.10) | 1.10 (0.55, 2.18) | 1.28 (0.43, 3.86) | 1.50 (0.52, 4.31) | 1.79 (0.80, 4.04) |
|        |            | <b>p-value</b>         | 0.9               | 0.6               | 0.1               | 0.8               | 0.7               | 0.5               | 0.2               |
| CYP2C9 | rs2298037  | <b>MAF<sup>a</sup></b> | 0.17/0.14         | 0.20/0.14         | 0.10/0.16         | 0.14/0.15         | 0.11/0.15         | 0.21/0.14         | 0.11/0.15         |
|        |            | <b>OR (95% CI)</b>     | 1.33 (0.79, 2.23) | 1.30 (0.66, 2.58) | 0.62 (0.30, 1.28) | 0.89 (0.50, 1.59) | 0.68 (0.24, 1.93) | 0.64 (0.33, 1.26) | 0.69 (0.31, 1.54) |
|        |            | <b>p-value</b>         | 0.3               | 0.4               | 0.2               | 0.7               | 0.5               | 0.2               | 0.4               |
| CYP2C9 | rs4917636  | <b>MAF<sup>a</sup></b> | 0.05/0.10         | 0.09/0.09         | 0.13/0.08         | 0.13/0.08         | 0.06/0.09         | 0.12/0.09         | 0.06/0.10         |
|        |            | <b>OR (95% CI)</b>     | 0.51 (0.22, 1.17) | 1.01 (0.38, 2.70) | 1.88 (0.93, 3.80) | 1.64 (0.84, 3.18) | 0.50 (0.12, 2.13) | 0.68 (0.28, 1.64) | 0.47 (0.16, 1.32) |
|        |            | <b>p-value</b>         | 0.1               | 1.0               | 0.1               | 0.1               | 0.3               | 0.4               | 0.1               |
| CYP2C9 | rs4918758  | <b>MAF<sup>a</sup></b> | 0.34/0.35         | 0.38/0.34         | 0.34/0.34         | 0.38/0.33         | 0.22/0.35         | 0.43/0.33         | 0.26/0.36         |

|        |            |                        |                   |                   |                   |                   |                   |                   |                   |
|--------|------------|------------------------|-------------------|-------------------|-------------------|-------------------|-------------------|-------------------|-------------------|
|        |            | <b>OR (95% CI)</b>     | 0.99 (0.66, 1.48) | 1.14 (0.65, 2.00) | 1.01 (0.63, 1.62) | 1.21 (0.79, 1.86) | 0.53 (0.24, 1.18) | 0.65 (0.37, 1.13) | 0.65 (0.37, 1.15) |
|        |            | <b>p-value</b>         | 1.0               | 0.7               | 1.0               | 0.4               | 0.1               | 0.1               | 0.1               |
| CYP2C9 | rs9332100  | <b>MAF<sup>a</sup></b> | 0.05/0.10         | 0.09/0.09         | 0.12/0.08         | 0.13/0.08         | 0.06/0.09         | 0.12/0.09         | 0.06/0.09         |
|        |            | <b>OR (95% CI)</b>     | 0.53 (0.23, 1.20) | 1.04 (0.39, 2.78) | 1.69 (0.82, 3.48) | 1.68 (0.86, 3.27) | 0.51 (0.12, 2.17) | 0.66 (0.27, 1.58) | 0.47 (0.17, 1.34) |
|        |            | <b>p-value</b>         | 0.1               | 0.9               | 0.2               | 0.1               | 0.4               | 0.3               | 0.2               |
| CYP2C9 | rs9332174  | <b>MAF<sup>a</sup></b> | 0.20/0.23         | 0.14/0.23         | 0.29/0.21         | 0.21/0.23         | 0.22/0.22         | 0.21/0.23         | 0.25/0.22         |
|        |            | <b>OR (95% CI)</b>     | 0.88 (0.54, 1.42) | 0.58 (0.27, 1.26) | 1.54 (0.92, 2.58) | 1.02 (0.61, 1.71) | 0.92 (0.40, 2.11) | 1.24 (0.63, 2.42) | 1.04 (0.57, 1.93) |
|        |            | <b>p-value</b>         | 0.6               | 0.2               | 0.1               | 0.9               | 0.8               | 0.5               | 0.9               |
| CYP2C9 | rs9332216  | <b>MAF<sup>a</sup></b> | 0.05/0.10         | 0.09/0.09         | 0.12/0.08         | 0.13/0.08         | 0.06/0.09         | 0.12/0.09         | 0.06/0.09         |
|        |            | <b>OR (95% CI)</b>     | 0.53 (0.23, 1.20) | 1.04 (0.39, 2.78) | 1.69 (0.82, 3.48) | 1.68 (0.86, 3.27) | 0.51 (0.12, 2.17) | 0.66 (0.27, 1.58) | 0.47 (0.17, 1.34) |
|        |            | <b>p-value</b>         | 0.1               | 0.9               | 0.2               | 0.1               | 0.4               | 0.3               | 0.2               |
| CYP2C9 | rs9332242  | <b>MAF<sup>a</sup></b> | 0.05/0.10         | 0.09/0.09         | 0.12/0.08         | 0.13/0.08         | 0.06/0.09         | 0.12/0.09         | 0.06/0.10         |
|        |            | <b>OR (95% CI)</b>     | 0.54 (0.24, 1.23) | 1.04 (0.39, 2.76) | 1.69 (0.82, 3.47) | 1.67 (0.86, 3.25) | 0.51 (0.12, 2.16) | 0.66 (0.27, 1.59) | 0.47 (0.17, 1.33) |
|        |            | <b>p-value</b>         | 0.1               | 0.9               | 0.2               | 0.1               | 0.4               | 0.4               | 0.2               |
| CYP2D6 | rs1135840  | <b>MAF<sup>a</sup></b> | 0.42/0.44         | 0.52/0.43         | 0.54/0.42         | 0.39/0.45         | 0.44/0.44         | 0.40/0.44         | 0.38/0.45         |
|        |            | <b>OR (95% CI)</b>     | 0.95 (0.65, 1.39) | 1.42 (0.84, 2.42) | 1.68 (1.08, 2.61) | 0.81 (0.54, 1.22) | 0.98 (0.51, 1.89) | 1.16 (0.67, 1.98) | 0.68 (0.40, 1.14) |
|        |            | <b>p-value</b>         | 0.8               | 0.2               | 0.0               | 0.3               | 1.0               | 0.6               | 0.1               |
| CYP2E1 | rs2070673  | <b>MAF<sup>a</sup></b> | 0.24/0.25         | 0.28/0.25         | 0.27/0.25         | 0.25/0.25         | 0.28/0.25         | 0.24/0.25         | 0.22/0.25         |
|        |            | <b>OR (95% CI)</b>     | 0.77 (0.46, 1.28) | 1.26 (0.62, 2.55) | 0.91 (0.51, 1.62) | 0.93 (0.54, 1.61) | 1.88 (0.81, 4.37) | 0.88 (0.43, 1.80) | 1.17 (0.59, 2.29) |
|        |            | <b>p-value</b>         | 0.3               | 0.5               | 0.8               | 0.8               | 0.1               | 0.7               | 0.7               |
| CYP2E1 | rs2515641  | <b>MAF<sup>a</sup></b> | 0.18/0.17         | 0.13/0.18         | 0.18/0.17         | 0.15/0.17         | 0.25/0.16         | 0.17/0.17         | 0.17/0.17         |
|        |            | <b>OR (95% CI)</b>     | 0.95 (0.56, 1.60) | 0.70 (0.31, 1.61) | 0.87 (0.47, 1.62) | 0.83 (0.46, 1.48) | 2.41 (1.09, 5.33) | 0.88 (0.42, 1.87) | 1.34 (0.67, 2.68) |
|        |            | <b>p-value</b>         | 0.8               | 0.4               | 0.7               | 0.5               | 0.0               | 0.7               | 0.4               |
| CYP3A4 | rs12333983 | <b>MAF<sup>a</sup></b> | 0.21/0.19         | 0.18/0.20         | 0.22/0.19         | 0.20/0.20         | 0.19/0.20         | 0.19/0.20         | 0.18/0.20         |
|        |            | <b>OR (95% CI)</b>     | 0.88 (0.50, 1.54) | 0.85 (0.38, 1.94) | 0.94 (0.49, 1.78) | 0.87 (0.47, 1.60) | 1.70 (0.66, 4.36) | 0.83 (0.37, 1.82) | 1.30 (0.62, 2.73) |
|        |            | <b>p-value</b>         | 0.7               | 0.7               | 0.8               | 0.7               | 0.3               | 0.6               | 0.5               |
| ERCC5  | rs1047768  | <b>MAF<sup>a</sup></b> | 0.36/0.43         | 0.46/0.40         | 0.41/0.41         | 0.44/0.40         | 0.42/0.41         | 0.45/0.41         | 0.39/0.41         |
|        |            | <b>OR (95% CI)</b>     | 0.75 (0.50, 1.13) | 1.24 (0.71, 2.17) | 1.02 (0.65, 1.62) | 1.12 (0.73, 1.72) | 1.00 (0.50, 2.02) | 0.83 (0.48, 1.42) | 0.88 (0.51, 1.51) |
|        |            | <b>p-value</b>         | 0.2               | 0.4               | 0.9               | 0.6               | 1.0               | 0.5               | 0.6               |
| ERCC5  | rs17655    | <b>MAF<sup>a</sup></b> | 0.28/0.26         | 0.27/0.26         | 0.32/0.25         | 0.26/0.26         | 0.14/0.27         | 0.24/0.26         | 0.24/0.27         |
|        |            | <b>OR (95% CI)</b>     | 1.05 (0.66, 1.67) | 1.04 (0.54, 2.01) | 1.34 (0.80, 2.25) | 0.95 (0.57, 1.56) | 0.49 (0.18, 1.33) | 1.06 (0.55, 2.05) | 0.97 (0.52, 1.83) |
|        |            | <b>p-value</b>         | 0.8               | 0.9               | 0.3               | 0.8               | 0.2               | 0.9               | 0.9               |
| ERCC5  | rs2016073  | <b>MAF<sup>a</sup></b> | 0.18/0.25         | 0.25/0.23         | 0.24/0.23         | 0.25/0.23         | 0.28/0.23         | 0.24/0.23         | 0.22/0.23         |
|        |            | <b>OR (95% CI)</b>     | 0.65 (0.39, 1.08) | 1.07 (0.54, 2.10) | 1.04 (0.60, 1.80) | 1.11 (0.66, 1.84) | 1.48 (0.65, 3.37) | 0.92 (0.47, 1.80) | 1.09 (0.57, 2.08) |
|        |            | <b>p-value</b>         | 0.1               | 0.9               | 0.9               | 0.7               | 0.3               | 0.8               | 0.8               |
| ERCC5  | rs2094258  | <b>MAF<sup>a</sup></b> | 0.17/0.17         | 0.20/0.17         | 0.22/0.16         | 0.20/0.17         | 0.11/0.18         | 0.14/0.18         | 0.13/0.18         |
|        |            | <b>OR (95% CI)</b>     | 0.98 (0.57, 1.67) | 1.20 (0.57, 2.50) | 1.45 (0.81, 2.59) | 1.23 (0.70, 2.15) | 0.59 (0.20, 1.75) | 1.38 (0.62, 3.09) | 0.62 (0.28, 1.37) |
|        |            | <b>p-value</b>         | 0.9               | 0.6               | 0.2               | 0.5               | 0.3               | 0.4               | 0.2               |
| ERCC5  | rs3759500  | <b>MAF<sup>a</sup></b> | 0.17/0.26         | 0.23/0.24         | 0.23/0.24         | 0.25/0.23         | 0.33/0.23         | 0.28/0.23         | 0.25/0.23         |
|        |            | <b>OR (95% CI)</b>     | 0.61 (0.37, 1.03) | 0.93 (0.47, 1.84) | 1.01 (0.58, 1.75) | 1.08 (0.65, 1.78) | 1.69 (0.78, 3.65) | 0.77 (0.41, 1.47) | 1.08 (0.58, 2.01) |
|        |            | <b>p-value</b>         | 0.1               | 0.8               | 1.0               | 0.8               | 0.2               | 0.4               | 0.8               |
| ERCC5  | rs4150351  | <b>MAF<sup>a</sup></b> | 0.18/0.15         | 0.09/0.16         | 0.12/0.16         | 0.12/0.17         | 0.19/0.15         | 0.19/0.15         | 0.21/0.15         |
|        |            | <b>OR (95% CI)</b>     | 1.42 (0.82, 2.48) | 0.51 (0.19, 1.36) | 0.76 (0.37, 1.56) | 0.69 (0.36, 1.34) | 1.15 (0.46, 2.84) | 0.79 (0.37, 1.69) | 1.24 (0.63, 2.44) |
|        |            | <b>p-value</b>         | 0.2               | 0.2               | 0.5               | 0.3               | 0.8               | 0.5               | 0.5               |
| ERCC5  | rs4150383  | <b>MAF<sup>a</sup></b> | 0.11/0.18         | 0.16/0.17         | 0.12/0.18         | 0.19/0.16         | 0.25/0.16         | 0.24/0.16         | 0.18/0.16         |



|       |            |                        |                   |                   |                   |                   |                   |                   |                   |
|-------|------------|------------------------|-------------------|-------------------|-------------------|-------------------|-------------------|-------------------|-------------------|
|       |            | <b>OR (95% CI)</b>     | 0.57 (0.30, 1.07) | 0.90 (0.40, 2.03) | 0.69 (0.34, 1.41) | 1.17 (0.65, 2.09) | 1.66 (0.70, 3.92) | 0.51 (0.25, 1.03) | 1.05 (0.52, 2.13) |
|       |            | <b>p-value</b>         | 0.1               | 0.8               | 0.3               | 0.6               | 0.2               | 0.1               | 0.9               |
| ERCC5 | rs4150386  | <b>MAF<sup>a</sup></b> | 0.10/0.10         | 0.09/0.10         | 0.10/0.10         | 0.10/0.10         | 0.06/0.10         | 0.12/0.10         | 0.11/0.10         |
|       |            | <b>OR (95% CI)</b>     | 1.07 (0.54, 2.12) | 0.89 (0.33, 2.39) | 1.14 (0.52, 2.49) | 1.00 (0.49, 2.04) | 0.43 (0.10, 1.90) | 0.75 (0.30, 1.85) | 1.04 (0.45, 2.41) |
|       |            | <b>p-value</b>         | 0.8               | 0.8               | 0.7               | 1.0               | 0.3               | 0.5               | 0.9               |
| ERCC5 | rs4743     | <b>MAF<sup>a</sup></b> | 0.42/0.40         | 0.43/0.40         | 0.33/0.42         | 0.41/0.41         | 0.47/0.40         | 0.40/0.41         | 0.44/0.40         |
|       |            | <b>OR (95% CI)</b>     | 1.12 (0.75, 1.67) | 1.14 (0.65, 2.01) | 0.75 (0.46, 1.20) | 1.06 (0.69, 1.63) | 1.16 (0.59, 2.29) | 1.09 (0.62, 1.90) | 1.07 (0.64, 1.78) |
|       |            | <b>p-value</b>         | 0.6               | 0.6               | 0.2               | 0.8               | 0.7               | 0.8               | 0.8               |
| G6PC  | rs161630   | <b>MAF<sup>a</sup></b> | 0.13/0.10         | 0.14/0.10         | 0.09/0.11         | 0.09/0.11         | 0.14/0.11         | 0.09/0.11         | 0.08/0.11         |
|       |            | <b>OR (95% CI)</b>     | 1.28 (0.68, 2.39) | 1.54 (0.67, 3.59) | 0.70 (0.31, 1.59) | 0.80 (0.38, 1.68) | 1.57 (0.57, 4.36) | 1.39 (0.52, 3.73) | 0.75 (0.29, 1.94) |
|       |            | <b>p-value</b>         | 0.4               | 0.3               | 0.4               | 0.6               | 0.4               | 0.5               | 0.6               |
| G6PC  | rs2229611  | <b>MAF<sup>a</sup></b> | 0.30/0.25         | 0.36/0.25         | 0.22/0.26         | 0.20/0.27         | 0.22/0.26         | 0.29/0.25         | 0.24/0.26         |
|       |            | <b>OR (95% CI)</b>     | 1.25 (0.80, 1.96) | 1.68 (0.93, 3.06) | 0.73 (0.42, 1.27) | 0.64 (0.38, 1.08) | 0.89 (0.39, 2.04) | 0.84 (0.45, 1.58) | 1.01 (0.55, 1.86) |
|       |            | <b>p-value</b>         | 0.3               | 0.1               | 0.3               | 0.1               | 0.8               | 0.6               | 1.0               |
| G6PC  | rs324079   | <b>MAF<sup>a</sup></b> | 0.16/0.14         | 0.18/0.14         | 0.13/0.15         | 0.11/0.15         | 0.08/0.15         | 0.21/0.14         | 0.15/0.14         |
|       |            | <b>OR (95% CI)</b>     | 1.13 (0.68, 1.88) | 1.21 (0.61, 2.40) | 0.88 (0.47, 1.64) | 0.66 (0.36, 1.23) | 0.57 (0.18, 1.83) | 0.63 (0.32, 1.23) | 1.21 (0.62, 2.37) |
|       |            | <b>p-value</b>         | 0.6               | 0.6               | 0.7               | 0.2               | 0.3               | 0.2               | 0.6               |
| GSTP1 | rs1138272  | <b>MAF<sup>a</sup></b> | 0.08/0.08         | 0.11/0.08         | 0.07/0.09         | 0.05/0.09         | 0.14/0.08         | 0.09/0.08         | 0.11/0.08         |
|       |            | <b>OR (95% CI)</b>     | 0.94 (0.45, 1.97) | 1.44 (0.57, 3.65) | 0.85 (0.34, 2.09) | 0.57 (0.23, 1.39) | 1.65 (0.60, 4.55) | 0.91 (0.33, 2.49) | 1.20 (0.52, 2.79) |
|       |            | <b>p-value</b>         | 0.9               | 0.4               | 0.7               | 0.2               | 0.3               | 0.8               | 0.7               |
| GSTP1 | rs1695     | <b>MAF<sup>a</sup></b> | 0.36/0.35         | 0.34/0.36         | 0.33/0.36         | 0.32/0.36         | 0.44/0.35         | 0.43/0.35         | 0.35/0.36         |
|       |            | <b>OR (95% CI)</b>     | 1.01 (0.68, 1.51) | 0.93 (0.52, 1.64) | 0.91 (0.57, 1.45) | 0.82 (0.53, 1.28) | 1.43 (0.73, 2.79) | 0.70 (0.41, 1.19) | 0.90 (0.53, 1.53) |
|       |            | <b>p-value</b>         | 0.9               | 0.8               | 0.7               | 0.4               | 0.3               | 0.2               | 0.7               |
| GSTP1 | rs6591256  | <b>MAF<sup>a</sup></b> | 0.43/0.39         | 0.38/0.41         | 0.36/0.41         | 0.35/0.42         | 0.50/0.40         | 0.47/0.40         | 0.43/0.40         |
|       |            | <b>OR (95% CI)</b>     | 1.20 (0.81, 1.79) | 0.89 (0.50, 1.58) | 0.83 (0.52, 1.34) | 0.74 (0.48, 1.15) | 1.41 (0.72, 2.79) | 0.73 (0.42, 1.27) | 1.03 (0.61, 1.72) |
|       |            | <b>p-value</b>         | 0.4               | 0.7               | 0.4               | 0.2               | 0.3               | 0.3               | 0.9               |
| GSTT1 | deletion   | <b>MAF<sup>a</sup></b> | 0.15/0.22         | 0.25/0.20         | 0.09/0.23         | 0.27/0.19         | 0.17/0.21         | 0.34/0.19         | 0.19/0.21         |
|       |            | <b>OR (95% CI)</b>     | 1.62 (0.76, 3.44) | 0.74 (0.30, 1.87) | 3.13 (1.06, 9.21) | 0.65 (0.32, 1.30) | 1.27 (0.35, 4.59) | 2.66 (1.13, 6.28) | 1.10 (0.44, 2.75) |
|       |            | <b>p-value</b>         | 0.2               | 0.5               | 0.0               | 0.2               | 0.7               | 0.0               | 0.8               |
| HIF1A | rs10873142 | <b>MAF<sup>a</sup></b> | 0.27/0.22         | 0.29/0.23         | 0.22/0.24         | 0.25/0.23         | 0.17/0.24         | 0.16/0.24         | 0.22/0.24         |
|       |            | <b>OR (95% CI)</b>     | 1.16 (0.71, 1.89) | 1.37 (0.70, 2.66) | 0.72 (0.40, 1.32) | 1.06 (0.63, 1.79) | 0.90 (0.36, 2.29) | 1.76 (0.79, 3.93) | 1.36 (0.72, 2.59) |
|       |            | <b>p-value</b>         | 0.5               | 0.4               | 0.3               | 0.8               | 0.8               | 0.2               | 0.3               |
| HIF1A | rs11549465 | <b>MAF<sup>a</sup></b> | 0.11/0.07         | 0.05/0.08         | 0.10/0.08         | 0.06/0.09         | 0.03/0.08         | 0.09/0.08         | 0.08/0.08         |
|       |            | <b>OR (95% CI)</b>     | 1.54 (0.81, 2.93) | 0.59 (0.18, 1.93) | 1.32 (0.63, 2.78) | 0.74 (0.33, 1.68) | 0.32 (0.04, 2.31) | 1.06 (0.41, 2.76) | 1.14 (0.48, 2.73) |
|       |            | <b>p-value</b>         | 0.2               | 0.4               | 0.5               | 0.5               | 0.3               | 0.9               | 0.8               |
| HIF1A | rs12434438 | <b>MAF<sup>a</sup></b> | 0.33/0.27         | 0.30/0.28         | 0.31/0.28         | 0.28/0.28         | 0.17/0.29         | 0.22/0.29         | 0.25/0.29         |
|       |            | <b>OR (95% CI)</b>     | 1.16 (0.73, 1.86) | 1.13 (0.58, 2.18) | 0.96 (0.56, 1.66) | 0.90 (0.54, 1.51) | 0.70 (0.27, 1.80) | 1.34 (0.66, 2.71) | 1.24 (0.66, 2.32) |
|       |            | <b>p-value</b>         | 0.5               | 0.7               | 0.9               | 0.7               | 0.5               | 0.4               | 0.5               |
| HIF1A | rs2057482  | <b>MAF<sup>a</sup></b> | 0.20/0.15         | 0.18/0.16         | 0.17/0.16         | 0.17/0.16         | 0.11/0.17         | 0.12/0.17         | 0.15/0.17         |
|       |            | <b>OR (95% CI)</b>     | 1.27 (0.75, 2.13) | 1.01 (0.48, 2.16) | 0.89 (0.47, 1.66) | 0.98 (0.55, 1.74) | 0.76 (0.26, 2.26) | 1.56 (0.66, 3.68) | 1.27 (0.62, 2.59) |
|       |            | <b>p-value</b>         | 0.4               | 1.0               | 0.7               | 0.9               | 0.6               | 0.3               | 0.5               |
| HIF1A | rs2301113  | <b>MAF<sup>a</sup></b> | 0.34/0.30         | 0.34/0.31         | 0.37/0.30         | 0.30/0.31         | 0.25/0.31         | 0.21/0.32         | 0.29/0.31         |
|       |            | <b>OR (95% CI)</b>     | 1.03 (0.67, 1.61) | 1.19 (0.64, 2.22) | 1.13 (0.68, 1.87) | 0.93 (0.58, 1.51) | 1.04 (0.48, 2.25) | 1.80 (0.89, 3.65) | 1.23 (0.70, 2.17) |
|       |            | <b>p-value</b>         | 0.9               | 0.6               | 0.6               | 0.8               | 0.9               | 0.1               | 0.5               |
| HNF4A | rs11086926 | <b>MAF<sup>a</sup></b> | 0.11/0.11         | 0.13/0.11         | 0.16/0.10         | 0.10/0.12         | 0.00/0.12         | 0.14/0.11         | 0.11/0.11         |

|       |            |                        |                   |                   |                   |                   |                   |                   |                   |
|-------|------------|------------------------|-------------------|-------------------|-------------------|-------------------|-------------------|-------------------|-------------------|
|       |            | <b>OR (95% CI)</b>     | 0.94 (0.50, 1.75) | 1.18 (0.50, 2.79) | 1.45 (0.75, 2.80) | 0.83 (0.41, 1.67) | 0.00 (0.00, 0.00) | 0.76 (0.34, 1.74) | 1.14 (0.50, 2.59) |
|       |            | <b>p-value</b>         | 0.8               | 0.7               | 0.3               | 0.6               | 0.9               | 0.5               | 0.8               |
| HNF4A | rs11574736 | <b>MAF<sup>a</sup></b> | 0.15/0.18         | 0.14/0.17         | 0.14/0.18         | 0.18/0.17         | 0.25/0.16         | 0.22/0.16         | 0.17/0.17         |
|       |            | <b>OR (95% CI)</b>     | 0.88 (0.50, 1.54) | 0.79 (0.35, 1.79) | 0.85 (0.44, 1.66) | 1.09 (0.62, 1.94) | 1.56 (0.67, 3.63) | 0.64 (0.31, 1.32) | 0.87 (0.42, 1.78) |
|       |            | <b>p-value</b>         | 0.6               | 0.6               | 0.6               | 0.8               | 0.3               | 0.2               | 0.7               |
| HNF4A | rs2071200  | <b>MAF<sup>a</sup></b> | 0.30/0.33         | 0.32/0.32         | 0.37/0.31         | 0.32/0.32         | 0.36/0.32         | 0.29/0.32         | 0.31/0.32         |
|       |            | <b>OR (95% CI)</b>     | 0.79 (0.51, 1.24) | 1.04 (0.56, 1.93) | 1.24 (0.75, 2.04) | 0.98 (0.61, 1.56) | 1.48 (0.68, 3.19) | 1.05 (0.56, 1.97) | 1.02 (0.56, 1.86) |
|       |            | <b>p-value</b>         | 0.3               | 0.9               | 0.4               | 0.9               | 0.3               | 0.9               | 0.9               |
| HNF4A | rs2425640  | <b>MAF<sup>a</sup></b> | 0.39/0.36         | 0.43/0.36         | 0.37/0.37         | 0.32/0.38         | 0.39/0.36         | 0.36/0.37         | 0.33/0.37         |
|       |            | <b>OR (95% CI)</b>     | 1.13 (0.74, 1.72) | 1.43 (0.80, 2.58) | 1.01 (0.62, 1.65) | 0.78 (0.49, 1.24) | 1.12 (0.53, 2.35) | 1.00 (0.55, 1.84) | 0.79 (0.44, 1.41) |
|       |            | <b>p-value</b>         | 0.6               | 0.2               | 1.0               | 0.3               | 0.8               | 1.0               | 0.4               |
| HNF4A | rs3212199  | <b>MAF<sup>a</sup></b> | 0.46/0.41         | 0.39/0.43         | 0.39/0.43         | 0.39/0.43         | 0.50/0.42         | 0.41/0.43         | 0.44/0.42         |
|       |            | <b>OR (95% CI)</b>     | 1.18 (0.79, 1.76) | 0.86 (0.48, 1.53) | 0.79 (0.49, 1.27) | 0.80 (0.52, 1.24) | 1.59 (0.78, 3.23) | 0.98 (0.55, 1.73) | 1.28 (0.74, 2.19) |
|       |            | <b>p-value</b>         | 0.4               | 0.6               | 0.3               | 0.3               | 0.2               | 0.9               | 0.4               |
| HNF4A | rs3818247  | <b>MAF<sup>a</sup></b> | 0.43/0.38         | 0.41/0.39         | 0.39/0.39         | 0.34/0.41         | 0.39/0.39         | 0.38/0.39         | 0.40/0.39         |
|       |            | <b>OR (95% CI)</b>     | 1.22 (0.80, 1.85) | 1.08 (0.60, 1.95) | 0.92 (0.56, 1.49) | 0.72 (0.46, 1.14) | 1.09 (0.52, 2.25) | 1.08 (0.59, 1.98) | 1.22 (0.71, 2.12) |
|       |            | <b>p-value</b>         | 0.4               | 0.8               | 0.7               | 0.2               | 0.8               | 0.8               | 0.5               |
| HNF4A | rs6031595  | <b>MAF<sup>a</sup></b> | 0.44/0.47         | 0.46/0.46         | 0.42/0.47         | 0.54/0.44         | 0.50/0.46         | 0.45/0.46         | 0.43/0.47         |
|       |            | <b>OR (95% CI)</b>     | 0.96 (0.64, 1.44) | 0.99 (0.56, 1.76) | 0.90 (0.56, 1.45) | 1.55 (1.00, 2.42) | 0.99 (0.50, 1.95) | 1.14 (0.65, 2.00) | 0.70 (0.42, 1.19) |
|       |            | <b>p-value</b>         | 0.8               | 1.0               | 0.7               | 0.1               | 1.0               | 0.6               | 0.2               |
| HNF4A | rs6073432  | <b>MAF<sup>a</sup></b> | 0.33/0.31         | 0.32/0.31         | 0.27/0.32         | 0.35/0.31         | 0.39/0.31         | 0.29/0.32         | 0.26/0.32         |
|       |            | <b>OR (95% CI)</b>     | 1.12 (0.73, 1.72) | 1.01 (0.54, 1.88) | 0.72 (0.42, 1.21) | 1.25 (0.79, 1.98) | 1.47 (0.72, 2.99) | 1.20 (0.65, 2.23) | 0.77 (0.43, 1.36) |
|       |            | <b>p-value</b>         | 0.6               | 1.0               | 0.2               | 0.3               | 0.3               | 0.6               | 0.4               |
| HNF4A | rs6093978  | <b>MAF<sup>a</sup></b> | 0.37/0.32         | 0.32/0.34         | 0.29/0.34         | 0.37/0.33         | 0.39/0.33         | 0.33/0.34         | 0.26/0.35         |
|       |            | <b>OR (95% CI)</b>     | 1.28 (0.84, 1.95) | 0.92 (0.49, 1.70) | 0.76 (0.45, 1.26) | 1.25 (0.79, 1.97) | 1.27 (0.62, 2.61) | 1.13 (0.61, 2.07) | 0.66 (0.37, 1.18) |
|       |            | <b>p-value</b>         | 0.3               | 0.8               | 0.3               | 0.3               | 0.5               | 0.7               | 0.2               |
| HNF4A | rs6130615  | <b>MAF<sup>a</sup></b> | 0.20/0.19         | 0.20/0.19         | 0.23/0.18         | 0.19/0.19         | 0.19/0.19         | 0.21/0.19         | 0.13/0.20         |
|       |            | <b>OR (95% CI)</b>     | 0.85 (0.47, 1.52) | 1.04 (0.45, 2.40) | 1.15 (0.60, 2.21) | 0.87 (0.46, 1.64) | 1.72 (0.63, 4.67) | 0.72 (0.32, 1.62) | 0.75 (0.32, 1.72) |
|       |            | <b>p-value</b>         | 0.6               | 0.9               | 0.7               | 0.7               | 0.3               | 0.4               | 0.5               |
| HNF4A | rs8114057  | <b>MAF<sup>a</sup></b> | 0.48/0.49         | 0.50/0.50         | 0.56/0.49         | 0.40/0.52         | 0.58/0.49         | 0.48/0.50         | 0.50/0.50         |
|       |            | <b>OR (95% CI)</b>     | 1.10 (0.74, 1.64) | 1.02 (0.58, 1.78) | 1.32 (0.84, 2.09) | 0.61 (0.40, 0.95) | 1.52 (0.74, 3.11) | 1.10 (0.63, 1.91) | 1.04 (0.61, 1.77) |
|       |            | <b>p-value</b>         | 0.6               | 0.9               | 0.2               | 0.0               | 0.3               | 0.7               | 0.9               |
| MDM2  | rs1625525  | <b>MAF<sup>a</sup></b> | 0.32/0.39         | 0.36/0.38         | 0.39/0.37         | 0.40/0.37         | 0.44/0.37         | 0.38/0.38         | 0.42/0.37         |
|       |            | <b>OR (95% CI)</b>     | 0.76 (0.50, 1.15) | 0.92 (0.52, 1.63) | 1.14 (0.71, 1.82) | 1.21 (0.79, 1.87) | 1.19 (0.61, 2.35) | 1.09 (0.62, 1.90) | 1.10 (0.65, 1.85) |
|       |            | <b>p-value</b>         | 0.2               | 0.8               | 0.6               | 0.4               | 0.6               | 0.8               | 0.7               |
| MDM2  | rs1846402  | <b>MAF<sup>a</sup></b> | 0.13/0.17         | 0.20/0.16         | 0.13/0.17         | 0.18/0.16         | 0.25/0.16         | 0.21/0.16         | 0.13/0.17         |
|       |            | <b>OR (95% CI)</b>     | 0.75 (0.42, 1.32) | 1.23 (0.60, 2.51) | 0.81 (0.42, 1.58) | 1.10 (0.63, 1.92) | 1.71 (0.76, 3.80) | 0.67 (0.33, 1.35) | 0.68 (0.32, 1.45) |
|       |            | <b>p-value</b>         | 0.3               | 0.6               | 0.5               | 0.7               | 0.2               | 0.3               | 0.3               |
| MDM2  | rs3730581  | <b>MAF<sup>a</sup></b> | 0.40/0.33         | 0.30/0.35         | 0.24/0.37         | 0.38/0.34         | 0.28/0.35         | 0.38/0.35         | 0.39/0.34         |
|       |            | <b>OR (95% CI)</b>     | 1.40 (0.94, 2.09) | 0.80 (0.44, 1.45) | 0.59 (0.35, 0.98) | 1.16 (0.76, 1.78) | 0.64 (0.30, 1.34) | 0.88 (0.50, 1.54) | 1.10 (0.66, 1.84) |
|       |            | <b>p-value</b>         | 0.1               | 0.5               | 0.0               | 0.5               | 0.2               | 0.6               | 0.7               |
| NAT2  | rs11780272 | <b>MAF<sup>a</sup></b> | 0.42/0.39         | 0.36/0.41         | 0.37/0.41         | 0.38/0.41         | 0.33/0.41         | 0.48/0.39         | 0.42/0.40         |
|       |            | <b>OR (95% CI)</b>     | 1.16 (0.79, 1.71) | 0.83 (0.48, 1.46) | 0.88 (0.56, 1.39) | 0.95 (0.63, 1.44) | 0.69 (0.35, 1.39) | 0.73 (0.43, 1.26) | 0.99 (0.60, 1.63) |
|       |            | <b>p-value</b>         | 0.4               | 0.5               | 0.6               | 0.8               | 0.3               | 0.3               | 1.0               |
| NAT2  | rs1208     | <b>MAF<sup>a</sup></b> | 0.43/0.41         | 0.39/0.41         | 0.40/0.41         | 0.39/0.42         | 0.33/0.42         | 0.48/0.40         | 0.40/0.41         |

|        |            |                        |                   |                   |                   |                   |                   |                   |                   |
|--------|------------|------------------------|-------------------|-------------------|-------------------|-------------------|-------------------|-------------------|-------------------|
|        |            | <b>OR (95% CI)</b>     | 1.10 (0.76, 1.61) | 0.93 (0.54, 1.60) | 0.95 (0.61, 1.47) | 0.93 (0.62, 1.39) | 0.71 (0.36, 1.42) | 0.75 (0.44, 1.29) | 0.96 (0.59, 1.57) |
|        |            | <b>p-value</b>         | 0.6               | 0.8               | 0.8               | 0.7               | 0.3               | 0.3               | 0.9               |
| NAT2   | rs17516895 | <b>MAF<sup>a</sup></b> | 0.33/0.32         | 0.30/0.32         | 0.26/0.33         | 0.28/0.33         | 0.50/0.31         | 0.28/0.33         | 0.43/0.30         |
|        |            | <b>OR (95% CI)</b>     | 1.07 (0.71, 1.63) | 0.91 (0.50, 1.67) | 0.71 (0.43, 1.19) | 0.79 (0.49, 1.25) | 2.14 (1.06, 4.32) | 1.35 (0.73, 2.49) | 1.76 (1.03, 3.02) |
|        |            | <b>p-value</b>         | 0.7               | 0.8               | 0.2               | 0.3               | 0.0               | 0.3               | 0.0               |
| NAT2   | rs1801280  | <b>MAF<sup>a</sup></b> | 0.44/0.42         | 0.38/0.43         | 0.41/0.43         | 0.41/0.43         | 0.39/0.43         | 0.48/0.42         | 0.42/0.42         |
|        |            | <b>OR (95% CI)</b>     | 1.11 (0.76, 1.62) | 0.82 (0.47, 1.42) | 0.97 (0.62, 1.51) | 0.97 (0.65, 1.46) | 0.83 (0.43, 1.61) | 0.80 (0.47, 1.38) | 0.92 (0.56, 1.50) |
|        |            | <b>p-value</b>         | 0.6               | 0.5               | 0.9               | 0.9               | 0.6               | 0.4               | 0.7               |
| NAT2   | rs1961456  | <b>MAF<sup>a</sup></b> | 0.30/0.32         | 0.34/0.31         | 0.40/0.30         | 0.36/0.30         | 0.22/0.32         | 0.29/0.32         | 0.24/0.33         |
|        |            | <b>OR (95% CI)</b>     | 0.86 (0.55, 1.35) | 1.14 (0.61, 2.13) | 1.62 (0.99, 2.67) | 1.27 (0.80, 2.02) | 0.58 (0.25, 1.35) | 1.09 (0.58, 2.05) | 0.59 (0.32, 1.11) |
|        |            | <b>p-value</b>         | 0.5               | 0.7               | 0.1               | 0.3               | 0.2               | 0.8               | 0.1               |
| NAT2   | rs4646242  | <b>MAF<sup>a</sup></b> | 0.27/0.28         | 0.30/0.28         | 0.18/0.30         | 0.27/0.28         | 0.44/0.27         | 0.24/0.28         | 0.39/0.26         |
|        |            | <b>OR (95% CI)</b>     | 0.93 (0.60, 1.43) | 1.13 (0.62, 2.05) | 0.52 (0.30, 0.93) | 0.94 (0.59, 1.49) | 2.09 (1.05, 4.17) | 1.26 (0.68, 2.34) | 1.80 (1.05, 3.08) |
|        |            | <b>p-value</b>         | 0.7               | 0.7               | 0.0               | 0.8               | 0.0               | 0.5               | 0.0               |
| NAT2   | rs4646243  | <b>MAF<sup>a</sup></b> | 0.13/0.17         | 0.16/0.16         | 0.17/0.16         | 0.21/0.15         | 0.08/0.16         | 0.22/0.15         | 0.11/0.17         |
|        |            | <b>OR (95% CI)</b>     | 0.71 (0.39, 1.29) | 0.95 (0.43, 2.13) | 1.06 (0.56, 2.02) | 1.64 (0.93, 2.87) | 0.44 (0.13, 1.53) | 0.57 (0.28, 1.19) | 0.67 (0.30, 1.49) |
|        |            | <b>p-value</b>         | 0.3               | 0.9               | 0.9               | 0.1               | 0.2               | 0.1               | 0.3               |
| NAT2   | rs4646246  | <b>MAF<sup>a</sup></b> | 0.18/0.21         | 0.21/0.21         | 0.23/0.20         | 0.24/0.20         | 0.17/0.21         | 0.24/0.20         | 0.15/0.21         |
|        |            | <b>OR (95% CI)</b>     | 0.77 (0.46, 1.31) | 1.04 (0.50, 2.15) | 1.18 (0.66, 2.09) | 1.31 (0.77, 2.22) | 0.80 (0.31, 2.08) | 0.75 (0.37, 1.51) | 0.71 (0.34, 1.45) |
|        |            | <b>p-value</b>         | 0.3               | 0.9               | 0.6               | 0.3               | 0.7               | 0.4               | 0.3               |
| NAT2   | rs6984200  | <b>MAF<sup>a</sup></b> | 0.27/0.30         | 0.30/0.29         | 0.21/0.31         | 0.28/0.29         | 0.47/0.28         | 0.26/0.29         | 0.39/0.28         |
|        |            | <b>OR (95% CI)</b>     | 0.86 (0.56, 1.33) | 1.07 (0.59, 1.93) | 0.62 (0.36, 1.06) | 0.93 (0.59, 1.47) | 2.28 (1.14, 4.55) | 1.21 (0.67, 2.21) | 1.73 (1.01, 2.95) |
|        |            | <b>p-value</b>         | 0.5               | 0.8               | 0.1               | 0.8               | 0.0               | 0.5               | 0.0               |
| NAT2   | rs7832071  | <b>MAF<sup>a</sup></b> | 0.45/0.41         | 0.38/0.42         | 0.42/0.41         | 0.39/0.42         | 0.36/0.42         | 0.48/0.41         | 0.38/0.42         |
|        |            | <b>OR (95% CI)</b>     | 1.15 (0.80, 1.67) | 0.86 (0.50, 1.47) | 1.02 (0.67, 1.57) | 0.92 (0.62, 1.37) | 0.80 (0.41, 1.57) | 0.78 (0.46, 1.32) | 0.84 (0.51, 1.37) |
|        |            | <b>p-value</b>         | 0.4               | 0.6               | 0.9               | 0.7               | 0.5               | 0.3               | 0.5               |
| NFE2L2 | rs13401026 | <b>MAF<sup>a</sup></b> | 0.13/0.12         | 0.13/0.12         | 0.19/0.11         | 0.11/0.13         | 0.08/0.13         | 0.14/0.12         | 0.07/0.13         |
|        |            | <b>OR (95% CI)</b>     | 1.00 (0.56, 1.81) | 1.03 (0.44, 2.39) | 1.70 (0.92, 3.15) | 0.80 (0.41, 1.56) | 0.74 (0.22, 2.54) | 0.85 (0.38, 1.89) | 0.56 (0.21, 1.48) |
|        |            | <b>p-value</b>         | 1.0               | 0.9               | 0.1               | 0.5               | 0.6               | 0.7               | 0.2               |
| NFE2L2 | rs2588882  | <b>MAF<sup>a</sup></b> | 0.11/0.08         | 0.07/0.08         | 0.08/0.08         | 0.06/0.09         | 0.08/0.08         | 0.07/0.08         | 0.08/0.08         |
|        |            | <b>OR (95% CI)</b>     | 1.44 (0.75, 2.75) | 0.84 (0.29, 2.41) | 0.95 (0.42, 2.17) | 0.68 (0.30, 1.55) | 1.00 (0.30, 3.35) | 1.15 (0.40, 3.32) | 0.96 (0.39, 2.40) |
|        |            | <b>p-value</b>         | 0.3               | 0.7               | 0.9               | 0.4               | 1.0               | 0.8               | 0.9               |
| NFE2L2 | rs8470     | <b>MAF<sup>a</sup></b> | 0.27/0.24         | 0.25/0.25         | 0.31/0.23         | 0.21/0.25         | 0.22/0.25         | 0.22/0.25         | 0.18/0.26         |
|        |            | <b>OR (95% CI)</b>     | 1.09 (0.70, 1.70) | 1.05 (0.55, 1.98) | 1.32 (0.80, 2.17) | 0.80 (0.48, 1.31) | 1.08 (0.47, 2.49) | 1.08 (0.56, 2.08) | 0.75 (0.39, 1.45) |
|        |            | <b>p-value</b>         | 0.7               | 0.9               | 0.3               | 0.4               | 0.9               | 0.8               | 0.4               |
| NFE2L2 | rs9068     | <b>MAF<sup>a</sup></b> | 0.28/0.24         | 0.25/0.25         | 0.32/0.24         | 0.21/0.26         | 0.22/0.25         | 0.24/0.25         | 0.19/0.26         |
|        |            | <b>OR (95% CI)</b>     | 1.08 (0.70, 1.69) | 1.01 (0.53, 1.91) | 1.34 (0.81, 2.20) | 0.75 (0.45, 1.23) | 1.07 (0.46, 2.46) | 0.99 (0.52, 1.89) | 0.81 (0.42, 1.55) |
|        |            | <b>p-value</b>         | 0.7               | 1.0               | 0.3               | 0.3               | 0.9               | 1.0               | 0.5               |
| NOS2A  | rs10459953 | <b>MAF<sup>a</sup></b> | 0.34/0.38         | 0.43/0.36         | 0.34/0.37         | 0.41/0.36         | 0.50/0.36         | 0.28/0.38         | 0.35/0.37         |
|        |            | <b>OR (95% CI)</b>     | 0.87 (0.59, 1.28) | 1.34 (0.79, 2.27) | 0.91 (0.58, 1.43) | 1.25 (0.83, 1.86) | 1.66 (0.86, 3.21) | 1.56 (0.86, 2.84) | 0.83 (0.49, 1.39) |
|        |            | <b>p-value</b>         | 0.5               | 0.3               | 0.7               | 0.3               | 0.1               | 0.1               | 0.5               |
| NOS2A  | rs1113283  | <b>MAF<sup>a</sup></b> | 0.27/0.19         | 0.16/0.22         | 0.21/0.21         | 0.19/0.22         | 0.11/0.22         | 0.29/0.20         | 0.18/0.22         |
|        |            | <b>OR (95% CI)</b>     | 1.47 (0.96, 2.26) | 0.72 (0.35, 1.45) | 0.99 (0.59, 1.67) | 0.83 (0.50, 1.37) | 0.47 (0.17, 1.31) | 0.64 (0.36, 1.14) | 0.78 (0.41, 1.47) |
|        |            | <b>p-value</b>         | 0.1               | 0.4               | 1.0               | 0.5               | 0.1               | 0.1               | 0.4               |
| NOS2A  | rs2297516  | <b>MAF<sup>a</sup></b> | 0.39/0.41         | 0.46/0.40         | 0.44/0.40         | 0.35/0.42         | 0.47/0.40         | 0.36/0.41         | 0.44/0.40         |
|        |            | <b>OR (95% CI)</b>     | 0.94 (0.62, 1.40) | 1.26 (0.72, 2.21) | 1.20 (0.75, 1.91) | 0.72 (0.46, 1.11) | 1.34 (0.68, 2.68) | 1.27 (0.71, 2.27) | 1.24 (0.73, 2.10) |

|         |            |                        |                   |                   |                   |                   |                   |                    |                   |
|---------|------------|------------------------|-------------------|-------------------|-------------------|-------------------|-------------------|--------------------|-------------------|
|         |            | <b>p-value</b>         | 0.7               | 0.4               | 0.4               | 0.1               | 0.4               | 0.4                | 0.4               |
| NOS2A   | rs2297518  | <b>MAF<sup>a</sup></b> | 0.18/0.16         | 0.13/0.17         | 0.12/0.17         | 0.15/0.17         | 0.14/0.17         | 0.26/0.15          | 0.18/0.16         |
|         |            | <b>OR (95% CI)</b>     | 1.16 (0.69, 1.94) | 0.71 (0.32, 1.61) | 0.71 (0.36, 1.38) | 0.91 (0.52, 1.60) | 0.76 (0.29, 2.01) | 0.53 (0.28, 1.00)  | 1.07 (0.55, 2.09) |
|         |            | <b>p-value</b>         | 0.6               | 0.4               | 0.3               | 0.7               | 0.6               | 0.1                | 0.8               |
| NOS2A   | rs2779252  | <b>MAF<sup>a</sup></b> | 0.05/0.06         | 0.04/0.06         | 0.07/0.06         | 0.08/0.05         | 0.00/0.06         | 0.07/0.06          | 0.06/0.06         |
|         |            | <b>OR (95% CI)</b>     | 0.87 (0.39, 1.93) | 0.60 (0.15, 2.39) | 1.10 (0.47, 2.55) | 1.42 (0.68, 2.98) | 0.00 (0.00, 0.00) | 0.80 (0.29, 2.21)  | 1.23 (0.45, 3.36) |
|         |            | <b>p-value</b>         | 0.7               | 0.5               | 0.8               | 0.3               | 1.0               | 0.7                | 0.7               |
| NOS2A   | rs3794763  | <b>MAF<sup>a</sup></b> | 0.22/0.23         | 0.21/0.23         | 0.34/0.21         | 0.19/0.24         | 0.19/0.23         | 0.16/0.24          | 0.25/0.22         |
|         |            | <b>OR (95% CI)</b>     | 0.93 (0.58, 1.51) | 0.85 (0.43, 1.69) | 2.05 (1.22, 3.43) | 0.71 (0.42, 1.22) | 0.86 (0.37, 2.01) | 1.81 (0.85, 3.87)  | 1.35 (0.74, 2.46) |
|         |            | <b>p-value</b>         | 0.8               | 0.6               | 0.0               | 0.2               | 0.7               | 0.1                | 0.3               |
| NOS2A   | rs4795067  | <b>MAF<sup>a</sup></b> | 0.37/0.31         | 0.25/0.33         | 0.28/0.34         | 0.29/0.34         | 0.28/0.33         | 0.47/0.31          | 0.33/0.33         |
|         |            | <b>OR (95% CI)</b>     | 1.29 (0.87, 1.92) | 0.68 (0.37, 1.24) | 0.79 (0.49, 1.27) | 0.80 (0.51, 1.24) | 0.77 (0.37, 1.62) | 0.55 (0.32, 0.93)  | 1.03 (0.61, 1.76) |
|         |            | <b>p-value</b>         | 0.2               | 0.2               | 0.3               | 0.3               | 0.5               | 0.0                | 0.9               |
| NOS2A   | rs4796052  | <b>MAF<sup>a</sup></b> | 0.19/0.18         | 0.13/0.19         | 0.16/0.19         | 0.19/0.18         | 0.14/0.19         | 0.28/0.17          | 0.19/0.18         |
|         |            | <b>OR (95% CI)</b>     | 1.11 (0.67, 1.81) | 0.62 (0.27, 1.40) | 0.82 (0.45, 1.51) | 1.06 (0.62, 1.79) | 0.67 (0.25, 1.75) | 0.57 (0.31, 1.06)  | 1.01 (0.53, 1.92) |
|         |            | <b>p-value</b>         | 0.7               | 0.2               | 0.5               | 0.8               | 0.4               | 0.1                | 1.0               |
| NOS2A   | rs8072199  | <b>MAF<sup>a</sup></b> | 0.45/0.37         | 0.30/0.40         | 0.36/0.40         | 0.34/0.40         | 0.56/0.38         | 0.38/0.39          | 0.38/0.39         |
|         |            | <b>OR (95% CI)</b>     | 1.54 (1.02, 2.31) | 0.68 (0.37, 1.24) | 0.92 (0.57, 1.48) | 0.78 (0.50, 1.22) | 1.82 (0.91, 3.62) | 1.06 (0.60, 1.88)  | 0.78 (0.46, 1.33) |
|         |            | <b>p-value</b>         | 0.0               | 0.2               | 0.7               | 0.3               | 0.1               | 0.8                | 0.4               |
| NOS2A   | rs944725   | <b>MAF<sup>a</sup></b> | 0.43/0.37         | 0.29/0.40         | 0.49/0.37         | 0.30/0.41         | 0.31/0.39         | 0.45/0.38          | 0.39/0.39         |
|         |            | <b>OR (95% CI)</b>     | 1.27 (0.84, 1.91) | 0.57 (0.30, 1.06) | 1.64 (1.02, 2.63) | 0.60 (0.38, 0.95) | 0.71 (0.34, 1.50) | 0.74 (0.42, 1.30)  | 1.10 (0.64, 1.88) |
|         |            | <b>p-value</b>         | 0.3               | 0.1               | 0.0               | 0.0               | 0.4               | 0.3                | 0.7               |
| NQO1    | rs10517    | <b>MAF<sup>a</sup></b> | 0.16/0.17         | 0.13/0.17         | 0.26/0.15         | 0.18/0.16         | 0.19/0.16         | 0.17/0.17          | 0.07/0.18         |
|         |            | <b>OR (95% CI)</b>     | 0.92 (0.55, 1.56) | 0.66 (0.29, 1.51) | 1.91 (1.11, 3.29) | 1.05 (0.61, 1.81) | 1.29 (0.55, 3.06) | 0.92 (0.45, 1.89)  | 0.37 (0.14, 0.97) |
|         |            | <b>p-value</b>         | 0.8               | 0.3               | 0.0               | 0.9               | 0.6               | 0.8                | 0.0               |
| NQO1    | rs17298718 | <b>MAF<sup>a</sup></b> | 0.06/0.07         | 0.11/0.07         | 0.09/0.07         | 0.04/0.08         | 0.06/0.07         | 0.07/0.07          | 0.08/0.07         |
|         |            | <b>OR (95% CI)</b>     | 0.84 (0.38, 1.87) | 1.71 (0.69, 4.21) | 1.41 (0.63, 3.15) | 0.58 (0.22, 1.52) | 0.72 (0.17, 3.10) | 1.00 (0.35, 2.83)  | 1.07 (0.41, 2.79) |
|         |            | <b>p-value</b>         | 0.7               | 0.2               | 0.4               | 0.3               | 0.7               | 1.0                | 0.9               |
| NQO1    | rs1800566  | <b>MAF<sup>a</sup></b> | 0.24/0.20         | 0.23/0.21         | 0.23/0.21         | 0.25/0.20         | 0.17/0.22         | 0.14/0.22          | 0.15/0.22         |
|         |            | <b>OR (95% CI)</b>     | 1.20 (0.76, 1.90) | 1.09 (0.57, 2.10) | 1.06 (0.62, 1.81) | 1.28 (0.79, 2.08) | 0.81 (0.33, 2.00) | 1.84 (0.84, 4.04)  | 0.73 (0.36, 1.47) |
|         |            | <b>p-value</b>         | 0.4               | 0.8               | 0.8               | 0.3               | 0.6               | 0.1                | 0.4               |
| PTGS2   | rs10911902 | <b>MAF<sup>a</sup></b> | 0.17/0.14         | 0.16/0.14         | 0.10/0.15         | 0.10/0.16         | 0.28/0.14         | 0.05/0.16          | 0.22/0.13         |
|         |            | <b>OR (95% CI)</b>     | 1.36 (0.82, 2.28) | 1.17 (0.56, 2.43) | 0.67 (0.33, 1.38) | 0.60 (0.31, 1.16) | 2.08 (0.98, 4.38) | 3.12 (0.96, 10.14) | 1.57 (0.85, 2.91) |
|         |            | <b>p-value</b>         | 0.2               | 0.7               | 0.3               | 0.1               | 0.1               | 0.1                | 0.2               |
| PTGS2   | rs5277     | <b>MAF<sup>a</sup></b> | 0.11/0.11         | 0.14/0.11         | 0.09/0.12         | 0.10/0.11         | 0.08/0.11         | 0.17/0.10          | 0.10/0.11         |
|         |            | <b>OR (95% CI)</b>     | 1.08 (0.58, 2.01) | 1.28 (0.58, 2.83) | 0.78 (0.36, 1.69) | 0.81 (0.41, 1.63) | 0.66 (0.19, 2.26) | 0.58 (0.27, 1.22)  | 0.81 (0.33, 1.97) |
|         |            | <b>p-value</b>         | 0.8               | 0.5               | 0.5               | 0.6               | 0.5               | 0.1                | 0.6               |
| SULT1A1 | rs1968752  | <b>MAF<sup>a</sup></b> | 0.35/0.40         | 0.29/0.40         | 0.47/0.38         | 0.39/0.39         | 0.50/0.38         | 0.40/0.39          | 0.39/0.39         |
|         |            | <b>OR (95% CI)</b>     | 0.79 (0.53, 1.19) | 0.61 (0.33, 1.13) | 1.47 (0.93, 2.33) | 1.05 (0.69, 1.61) | 1.58 (0.80, 3.13) | 1.00 (0.57, 1.77)  | 0.92 (0.55, 1.56) |
|         |            | <b>p-value</b>         | 0.3               | 0.1               | 0.1               | 0.8               | 0.2               | 1.0                | 0.8               |
| TP53    | rs1614984  | <b>MAF<sup>a</sup></b> | 0.36/0.45         | 0.52/0.42         | 0.34/0.44         | 0.44/0.43         | 0.53/0.42         | 0.47/0.42          | 0.43/0.43         |
|         |            | <b>OR (95% CI)</b>     | 0.71 (0.47, 1.08) | 1.54 (0.87, 2.72) | 0.67 (0.41, 1.09) | 1.05 (0.68, 1.62) | 1.49 (0.73, 3.04) | 0.60 (0.34, 1.06)  | 0.95 (0.56, 1.64) |
|         |            | <b>p-value</b>         | 0.1               | 0.1               | 0.1               | 0.8               | 0.3               | 0.1                | 0.9               |
| XPA     | rs1800975  | <b>MAF<sup>a</sup></b> | 0.33/0.35         | 0.45/0.33         | 0.28/0.36         | 0.35/0.35         | 0.36/0.34         | 0.36/0.34          | 0.35/0.35         |
|         |            | <b>OR (95% CI)</b>     | 0.96 (0.64, 1.44) | 1.50 (0.87, 2.59) | 0.72 (0.44, 1.17) | 0.98 (0.64, 1.51) | 1.03 (0.51, 2.07) | 0.93 (0.54, 1.62)  | 1.03 (0.61, 1.75) |
|         |            | <b>p-value</b>         | 0.8               | 0.1               | 0.2               | 0.9               | 0.9               | 0.8                | 0.9               |

|     |           |                        |                   |                   |                   |                   |                   |                   |                   |
|-----|-----------|------------------------|-------------------|-------------------|-------------------|-------------------|-------------------|-------------------|-------------------|
| XPA | rs3176757 | <b>MAF<sup>a</sup></b> | 0.20/0.22         | 0.29/0.21         | 0.22/0.22         | 0.21/0.22         | 0.22/0.22         | 0.28/0.21         | 0.17/0.22         |
|     |           | <b>OR (95% CI)</b>     | 0.86 (0.54, 1.39) | 1.47 (0.80, 2.72) | 1.03 (0.60, 1.75) | 0.91 (0.55, 1.52) | 1.03 (0.46, 2.32) | 0.71 (0.39, 1.31) | 0.71 (0.37, 1.38) |
|     |           | <b>p-value</b>         | 0.5               | 0.2               | 0.9               | 0.7               | 0.9               | 0.3               | 0.3               |
| XPC | rs10468   | <b>MAF<sup>a</sup></b> | 0.19/0.18         | 0.16/0.19         | 0.10/0.20         | 0.16/0.19         | 0.33/0.17         | 0.21/0.18         | 0.22/0.18         |
|     |           | <b>OR (95% CI)</b>     | 1.13 (0.68, 1.89) | 0.83 (0.39, 1.79) | 0.47 (0.22, 0.99) | 0.84 (0.48, 1.48) | 2.15 (1.02, 4.53) | 0.87 (0.43, 1.76) | 1.19 (0.64, 2.20) |
|     |           | <b>p-value</b>         | 0.6               | 0.6               | 0.0               | 0.5               | 0.0               | 0.7               | 0.6               |
| XPC | rs1106087 | <b>MAF<sup>a</sup></b> | 0.20/0.19         | 0.21/0.19         | 0.14/0.20         | 0.20/0.19         | 0.31/0.18         | 0.16/0.20         | 0.18/0.19         |
|     |           | <b>OR (95% CI)</b>     | 1.18 (0.72, 1.94) | 1.12 (0.56, 2.25) | 0.68 (0.36, 1.31) | 1.06 (0.62, 1.81) | 1.79 (0.85, 3.77) | 1.51 (0.70, 3.27) | 0.89 (0.46, 1.70) |
|     |           | <b>p-value</b>         | 0.5               | 0.7               | 0.3               | 0.8               | 0.1               | 0.3               | 0.7               |
| XPC | rs2228000 | <b>MAF<sup>a</sup></b> | 0.20/0.19         | 0.21/0.19         | 0.14/0.20         | 0.20/0.19         | 0.31/0.19         | 0.16/0.20         | 0.18/0.20         |
|     |           | <b>OR (95% CI)</b>     | 1.17 (0.71, 1.92) | 1.11 (0.55, 2.22) | 0.67 (0.35, 1.29) | 1.05 (0.61, 1.79) | 1.77 (0.84, 3.75) | 1.55 (0.71, 3.36) | 0.88 (0.46, 1.69) |
|     |           | <b>p-value</b>         | 0.5               | 0.8               | 0.2               | 0.9               | 0.1               | 0.3               | 0.7               |
| XPC | rs2228001 | <b>MAF<sup>a</sup></b> | 0.41/0.39         | 0.46/0.39         | 0.44/0.39         | 0.33/0.41         | 0.47/0.39         | 0.31/0.41         | 0.42/0.40         |
|     |           | <b>OR (95% CI)</b>     | 1.07 (0.72, 1.58) | 1.38 (0.80, 2.38) | 1.28 (0.82, 2.01) | 0.71 (0.46, 1.09) | 1.30 (0.67, 2.53) | 1.49 (0.83, 2.66) | 0.98 (0.59, 1.62) |
|     |           | <b>p-value</b>         | 0.7               | 0.3               | 0.3               | 0.1               | 0.4               | 0.2               | 0.9               |
| XPC | rs2470458 | <b>MAF<sup>a</sup></b> | 0.20/0.16         | 0.14/0.18         | 0.11/0.19         | 0.17/0.17         | 0.31/0.16         | 0.16/0.18         | 0.17/0.17         |
|     |           | <b>OR (95% CI)</b>     | 1.32 (0.82, 2.14) | 0.77 (0.36, 1.67) | 0.58 (0.29, 1.16) | 0.99 (0.58, 1.68) | 2.03 (0.97, 4.22) | 1.23 (0.58, 2.60) | 0.91 (0.47, 1.76) |
|     |           | <b>p-value</b>         | 0.2               | 0.5               | 0.1               | 1.0               | 0.1               | 0.6               | 0.8               |
| XPC | rs2607737 | <b>MAF<sup>a</sup></b> | 0.46/0.49         | 0.41/0.49         | 0.40/0.50         | 0.54/0.47         | 0.47/0.48         | 0.43/0.47         | 0.50/0.48         |
|     |           | <b>OR (95% CI)</b>     | 0.91 (0.61, 1.35) | 0.72 (0.41, 1.27) | 0.68 (0.43, 1.08) | 1.38 (0.90, 2.11) | 0.93 (0.46, 1.89) | 0.67 (0.38, 1.18) | 1.12 (0.67, 1.87) |
|     |           | <b>p-value</b>         | 0.6               | 0.3               | 0.1               | 0.1               | 0.8               | 0.2               | 0.7               |
| XPC | rs2607772 | <b>MAF<sup>a</sup></b> | 0.40/0.39         | 0.46/0.39         | 0.44/0.38         | 0.32/0.41         | 0.47/0.39         | 0.31/0.40         | 0.42/0.39         |
|     |           | <b>OR (95% CI)</b>     | 1.05 (0.71, 1.55) | 1.40 (0.81, 2.42) | 1.31 (0.84, 2.06) | 0.69 (0.45, 1.07) | 1.31 (0.67, 2.54) | 1.46 (0.82, 2.61) | 0.98 (0.59, 1.63) |
|     |           | <b>p-value</b>         | 0.8               | 0.2               | 0.2               | 0.1               | 0.4               | 0.2               | 0.9               |
| XPC | rs2733534 | <b>MAF<sup>a</sup></b> | 0.40/0.44         | 0.36/0.44         | 0.33/0.45         | 0.49/0.41         | 0.42/0.43         | 0.45/0.42         | 0.46/0.43         |
|     |           | <b>OR (95% CI)</b>     | 0.90 (0.60, 1.37) | 0.67 (0.37, 1.23) | 0.63 (0.38, 1.03) | 1.44 (0.92, 2.25) | 0.84 (0.41, 1.70) | 0.59 (0.33, 1.06) | 1.11 (0.65, 1.88) |
|     |           | <b>p-value</b>         | 0.6               | 0.2               | 0.1               | 0.1               | 0.6               | 0.1               | 0.7               |
| XPC | rs2733537 | <b>MAF<sup>a</sup></b> | 0.30/0.26         | 0.27/0.27         | 0.20/0.28         | 0.27/0.27         | 0.39/0.26         | 0.26/0.27         | 0.25/0.27         |
|     |           | <b>OR (95% CI)</b>     | 1.25 (0.80, 1.96) | 0.94 (0.49, 1.80) | 0.62 (0.35, 1.11) | 1.00 (0.62, 1.62) | 1.81 (0.87, 3.75) | 1.17 (0.60, 2.27) | 0.91 (0.50, 1.65) |
|     |           | <b>p-value</b>         | 0.3               | 0.9               | 0.1               | 1.0               | 0.1               | 0.6               | 0.7               |
| XPC | rs2733587 | <b>MAF<sup>a</sup></b> | 0.09/0.09         | 0.13/0.09         | 0.06/0.10         | 0.09/0.09         | 0.11/0.09         | 0.10/0.09         | 0.07/0.09         |
|     |           | <b>OR (95% CI)</b>     | 1.05 (0.52, 2.13) | 1.50 (0.61, 3.69) | 0.53 (0.20, 1.42) | 0.98 (0.46, 2.08) | 1.29 (0.42, 3.97) | 0.87 (0.33, 2.25) | 0.78 (0.29, 2.10) |
|     |           | <b>p-value</b>         | 0.9               | 0.4               | 0.2               | 1.0               | 0.7               | 0.8               | 0.6               |
| XPC | rs3731149 | <b>MAF<sup>a</sup></b> | 0.21/0.26         | 0.20/0.25         | 0.23/0.25         | 0.33/0.23         | 0.08/0.26         | 0.34/0.24         | 0.24/0.25         |
|     |           | <b>OR (95% CI)</b>     | 0.79 (0.48, 1.28) | 0.68 (0.33, 1.40) | 0.92 (0.53, 1.60) | 1.80 (1.11, 2.91) | 0.24 (0.07, 0.80) | 0.59 (0.32, 1.09) | 0.97 (0.53, 1.78) |
|     |           | <b>p-value</b>         | 0.3               | 0.3               | 0.8               | 0.0               | 0.0               | 0.1               | 0.9               |
