# Supplementary material for: Gastrointestinal Stromal Tumors, Somatic Mutations and Candidate Genetic Risk Variants
Source: PubMed Central journal article supplement (PMC3630216; doi:10.1371/journal.pone.0062119), 2013-04-18
Supplement: pone.0062119.s003.pdf [file pone.0062119.s003.pdf]

| Supplementary Table S3: P-values for sequence kernel association test (SKAT) for remaining genes, by mutation type |                                     |                          |                               |                               |                       |                    |           |
|--------------------------------------------------------------------------------------------------------------------|-------------------------------------|--------------------------|-------------------------------|-------------------------------|-----------------------|--------------------|-----------|
| Gene                                                                                                               | KIT exon 11 codon<br>557-8 deletion | KIT exon 11<br>insertion | KIT exon 11<br>other deletion | KIT exon 11<br>point mutation | Other KIT<br>mutation | PDGFRA<br>mutation | Wild type |
| ADH1A                                                                                                              | 0.8                                 | 1.0                      | 0.1                           | 0.6                           | 0.1                   | 0.1                | 0.3       |
| ADH1B                                                                                                              | 0.1                                 | 0.6                      | 0.4                           | 0.9                           | 0.5                   | 0.2                | 0.3       |
| ADH1C                                                                                                              | 0.1                                 | 0.3                      | 0.4                           | 0.5                           | 0.2                   | 0.5                | 0.2       |
| AHR                                                                                                                | 0.8                                 | 0.7                      | 0.8                           | 0.1                           | 0.5                   | 0.5                | 0.3       |
| ALDH18A1                                                                                                           | 0.6                                 | 0.8                      | 0.1                           | 0.4                           | 0.9                   | 0.3                | 0.9       |
| ALDH1A1                                                                                                            | 0.5                                 | 0.7                      | 1.0                           | 0.4                           | 0.2                   | 1.0                | 1.0       |
| ALDH1A2                                                                                                            | 0.3                                 | 0.7                      | 0.6                           | 0.4                           | 0.9                   | 0.5                | 0.5       |
| ALDH1A3                                                                                                            | 0.6                                 | 0.3                      | 0.2                           | 0.8                           | 0.4                   | 0.8                | 0.7       |
| ALDH1B1                                                                                                            | 0.6                                 | 0.5                      | 0.4                           | 0.7                           | 0.8                   | 0.7                | 1.0       |
| ALDH1L1                                                                                                            | 0.4                                 | 0.2                      | 0.3                           | 0.8                           | 1.0                   | 0.4                | 0.1       |
| ALDH1L2                                                                                                            | 0.5                                 | 0.2                      | 0.2                           | 0.9                           | 0.6                   | 0.9                | 0.01      |
| ALDH2                                                                                                              | 0.5                                 | 0.03                     | 0.9                           | 0.6                           | 0.7                   | 0.2                | 0.2       |
| CYP1A2                                                                                                             | 0.1                                 | 0.3                      | 0.6                           | 0.5                           | 0.9                   | 0.3                | 0.9       |
| CYP2B6                                                                                                             | 0.4                                 | 0.2                      | 1.0                           | 0.1                           | 0.9                   | 0.5                | 0.1       |
| CYP2C8                                                                                                             | 0.4                                 | 0.4                      | 0.1                           | 0.7                           | 0.8                   | 0.9                | 0.2       |
| CYP2C9                                                                                                             | 0.5                                 | 0.9                      | 0.3                           | 0.3                           | 0.6                   | 0.4                | 0.1       |
| CYP2D6                                                                                                             | 0.7                                 | 0.3                      | 0.02                          | 0.3                           | 1.0                   | 0.8                | 0.2       |
| CYP2E1                                                                                                             | 0.5                                 | 0.5                      | 0.9                           | 0.9                           | 0.04                  | 0.3                | 0.7       |
| CYP3A4                                                                                                             | 0.2                                 | 0.4                      | 0.4                           | 0.7                           | 0.3                   | 0.9                | 0.6       |
| ERCC5                                                                                                              | 0.1                                 | 0.9                      | 0.7                           | 1.0                           | 0.7                   | 0.7                | 0.9       |
| G6PC                                                                                                               | 0.6                                 | 0.1                      | 0.5                           | 0.2                           | 0.5                   | 0.4                | 0.4       |
| GSTP1                                                                                                              | 0.5                                 | 0.5                      | 0.9                           | 0.3                           | 0.4                   | 0.3                | 0.9       |
| GSTT1                                                                                                              | 0.2                                 | 0.6                      | 0.02                          | 0.1                           | 0.7                   | 0.04               | 0.8       |
| HIF1A                                                                                                              | 0.4                                 | 0.7                      | 0.3                           | 0.5                           | 0.8                   | 0.2                | 0.8       |
| HNF4A                                                                                                              | 0.6                                 | 1.0                      | 0.4                           | 0.1                           | 0.3                   | 0.6                | 0.7       |
| MDM2                                                                                                               | 0.2                                 | 0.7                      | 0.2                           | 0.7                           | 0.3                   | 0.6                | 0.4       |
| NAT2                                                                                                               | 0.4                                 | 1.0                      | 0.3                           | 0.6                           | 0.2                   | 0.3                | 0.1       |
| NFE2L2                                                                                                             | 0.8                                 | 0.7                      | 0.1                           | 0.4                           | 0.3                   | 0.7                | 0.5       |
| NOS2A                                                                                                              | 0.3                                 | 0.5                      | 0.2                           | 0.2                           | 0.3                   | 0.2                | 0.7       |
| NQO1                                                                                                               | 0.9                                 | 0.5                      | 0.03                          | 0.5                           | 0.8                   | 0.5                | 0.1       |
| PTGS2                                                                                                              | 0.3                                 | 0.6                      | 0.6                           | 0.2                           | 0.1                   | 0.1                | 0.4       |
| SULT1A1                                                                                                            | 0.3                                 | 0.1                      | 0.1                           | 0.9                           | 0.3                   | 1.0                | 0.3       |
| TP53                                                                                                               | 0.1                                 | 0.2                      | 0.2                           | 0.5                           | 0.2                   | 0.1                | 1.0       |
| XPA                                                                                                                | 0.8                                 | 0.2                      | 0.3                           | 1.0                           | 0.9                   | 0.6                | 0.7       |
| XPC                                                                                                                | 0.6                                 | 0.6                      | 0.1                           | 0.3                           | 0.1                   | 0.2                | 1.0       |
